# Supplementary material for: How much of the stalled mortality trends in Scotland and England can be attributed to obesity?
Source: PubMed Central journal article supplement — BMJ Open. 2022 Dec 14;12(12):e067310. doi: 10.1136/bmjopen-2022-067310 (PMC9756156; doi:10.1136/bmjopen-2022-067310), 2022-12-14
Supplement: bmjopen-2022-067310.draft_revisions.pdf [file bmjopen-2022-067310.draft_revisions.pdf]

# BMJ Open

BMJ Open is committed to open peer review. As part of this commitment we make the peer review history of every article we publish publicly available.

When an article is published we post the peer reviewers' comments and the authors' responses online. We also post the versions of the paper that were used during peer review. These are the versions that the peer review comments apply to.

The versions of the paper that follow are the versions that were submitted during the peer review process. They are not the versions of record or the final published versions. They should not be cited or distributed as the published version of this manuscript.

BMJ Open is an open access journal and the full, final, typeset and author-corrected version of record of the manuscript is available on our site with no access controls, subscription charges or pay-per-view fees (<http://bmjopen.bmj.com>).

If you have any questions on BMJ Open's open peer review process please email [info.bmjopen@bmj.com](mailto:info.bmjopen@bmj.com)

# BMJ Open

## How much of the stalled mortality trends in Scotland and England can be attributed to obesity?

|                               |                                                                                                                                                                                                                               |
|-------------------------------|-------------------------------------------------------------------------------------------------------------------------------------------------------------------------------------------------------------------------------|
| Journal:                      | <i>BMJ Open</i>                                                                                                                                                                                                               |
| Manuscript ID                 | bmjopen-2022-067310                                                                                                                                                                                                           |
| Article Type:                 | Original research                                                                                                                                                                                                             |
| Date Submitted by the Author: | 10-Aug-2022                                                                                                                                                                                                                   |
| Complete List of Authors:     | Walsh, David; Glasgow Centre for Population Health<br>Tod, Elaine; Public Health Scotland Glasgow Office<br>McCartney, Gerry; University of Glasgow; Public Health Scotland<br>Glasgow Office, Clinical and Protecting Health |
| Keywords:                     | PUBLIC HEALTH, SOCIAL MEDICINE, EPIDEMIOLOGY                                                                                                                                                                                  |
|                               |                                                                                                                                                                                                                               |

SCHOLARONE™  
Manuscripts

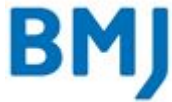

I, the Submitting Author has the right to grant and does grant on behalf of all authors of the Work (as defined in the below author licence), an exclusive licence and/or a non-exclusive licence for contributions from authors who are: i) UK Crown employees; ii) where BMJ has agreed a CC-BY licence shall apply, and/or iii) in accordance with the terms applicable for US Federal Government officers or employees acting as part of their official duties; on a worldwide, perpetual, irrevocable, royalty-free basis to BMJ Publishing Group Ltd ("BMJ") its licensees and where the relevant Journal is co-owned by BMJ to the co-owners of the Journal, to publish the Work in this journal and any other BMJ products and to exploit all rights, as set out in our [licence](#).

The Submitting Author accepts and understands that any supply made under these terms is made by BMJ to the Submitting Author unless you are acting as an employee on behalf of your employer or a postgraduate student of an affiliated institution which is paying any applicable article publishing charge ("APC") for Open Access articles. Where the Submitting Author wishes to make the Work available on an Open Access basis (and intends to pay the relevant APC), the terms of reuse of such Open Access shall be governed by a Creative Commons licence – details of these licences and which [Creative Commons](#) licence will apply to this Work are set out in our licence referred to above.

Other than as permitted in any relevant BMJ Author's Self Archiving Policies, I confirm this Work has not been accepted for publication elsewhere, is not being considered for publication elsewhere and does not duplicate material already published. I confirm all authors consent to publication of this Work and authorise the granting of this licence.

1  
2  
3 **How much of the stalled mortality trends in Scotland and England can be attributed to**  
4  
5 **obesity?**  
6  
7

8 **David Walsh<sup>1</sup>, Elaine Tod<sup>2</sup>, Gerry McCartney<sup>3</sup>**  
9

- 10  
11 1. Public Health Programme Manager, Glasgow Centre for Population Health, Olympia  
12 Building, 2-16 Orr Street, Bridgeton Cross, Glasgow G40 2QH, Scotland. Tel: 0141 330  
13 2793  
14  
15  
16  
17  
18 2. Public Health Intelligence Adviser, Public Health Scotland, Glasgow, Scotland  
19  
20  
21  
22 3. Professor of Wellbeing Economy, College of Social Sciences, University of Glasgow,  
23 Glasgow, Scotland.  
24  
25

26  
27 Correspondence to: [david.walsh.2@glasgow.ac.uk](mailto:david.walsh.2@glasgow.ac.uk)  
28  
29

30 **Keywords:** obesity, mortality, 'population attributable fractions', austerity, Scotland,  
31  
32 England  
33  
34  
35  
36  
37  
38  
39  
40  
41  
42  
43  
44  
45  
46  
47  
48  
49  
50  
51  
52  
53  
54  
55  
56  
57  
58  
59  
60

## Abstract

### Objectives

The rate of improvement in all-cause mortality rates has slowed in the UK since around 2012. While evidence suggests that UK Government 'austerity' policies have been largely responsible, it has been proposed that rising obesity may also have contributed. The aim here was to estimate this contribution for Scotland and England.

### Methods

We calculated population attributable fractions (PAFs) resulting from changes in Body Mass Index (BMI) between the mid-1990s and late 2000s for all-cause mortality among 35-89 year-olds in 2017-19. We used BMI data from national surveys, and hazard ratios (HRs) from a meta-analysis of 89 European studies. PAFs were applied to mortality data for 2017-19, enabling comparison of observed rates, BMI-adjusted rates and projected rates. Uncertainty in the estimates is dominated by the assumptions used and biases in the underlying data, rather than random variation. A series of sensitivity analyses and bias assessments were therefore undertaken to understand the certainty of the estimates.

### Results

In Scotland, an estimated 10% (males) and 14% (females) of the difference between observed and predicted mortality rates in 2017-19 may be attributable to previous changes in BMI. The equivalent figures for England were notably higher: 20% and 35% respectively. The assessments of bias suggest these are more likely to be overestimates than underestimates.

## Conclusions

Some of the recent stalled mortality trends in Scotland and England may be associated with earlier increases in obesity. Policies to reduce the obesogenic environment, including its structural and commercial determinants, and reverse the impacts of austerity, are needed.

(250 words)

For peer review only

## INTRODUCTION

Deeply concerning changes to mortality rates have been observed across the UK since the early 2010s: population average mortality rates have stopped improving, whilst mortality rates among poorer populations have increased<sup>1-5</sup>. Such changes have been seen for many different causes of death, with cardiovascular mortality particularly affected<sup>6,7</sup>. Similar stalled mortality trends have been recorded in other high-income countries<sup>2</sup>.

While the causes of these changes in the UK have been debated, a large body of evidence now suggests that UK Government 'austerity' measures, implemented in 2010 following 'the great recession' of 2008 and which have disproportionately affected the poorest in society, are largely to blame<sup>8-14</sup>. The impact of similar austerity measures in slowing mortality improvement in other countries has also been demonstrated<sup>15-18</sup>.

However, it has also been proposed that these trends may have additionally been influenced by changes in levels of adult obesity prevalence: this has been suggested in relation to the UK<sup>19</sup>, the US<sup>20,21</sup>, Australia<sup>21</sup> and elsewhere<sup>22</sup>. This is largely because of two factors. First, there is a clear association between obesity and both cause-specific (including cardiovascular disease) and all-cause mortality, with the weight of evidence suggesting this relationship is causal<sup>23</sup>. Second, considerable increases in obesity prevalence have been recorded in the UK (and elsewhere) in recent decades<sup>24</sup>, and these pre-date the more recent changes to all-cause mortality discussed above. While this hypothesis appears plausible, it has not yet been tested. The aim of this study, therefore, was to assess, and quantify, the extent to which any of the mortality changes observed in Scotland and England since the early 2010s may be attributable to prior increases in obesity levels in the population.

## METHODS

### *Populations and data sources*

We used data for the populations of Scotland and England: the change in mortality rates since 2012 has been similar in both countries<sup>3</sup>, and trend data on adult obesity prevalence are available for both.

Mortality (and matching population denominator) data by age, sex and year were obtained from the National Records of Scotland (NRS) and the Office for National Statistics (ONS) respectively. Data on adult body mass index (BMI) distribution in the populations were accessed from the Scottish Health Survey (SHeS) and the Health Survey for England (HSE) via the UK Data Service<sup>25-27</sup>. Both are long-running, nationally-representative, surveys which include measured (rather than self-reported) height and weight (from which BMI is calculated) for large samples of the adult population.

### *Statistical analyses*

Population attributable fractions (PAFs) were calculated for changes in BMI distribution (including therefore the increase in overweight and obesity) between the mid-1990s and late 2000s in relation to all-cause mortality among 35-89 year-olds. PAFs are defined as the proportion of cases (here, all-cause deaths) attributable to a particular exposure<sup>28</sup>: in this case the latter is defined as the change in BMI distribution over time. The 35-89 year age group was determined by the availability of age-specific hazard ratios (HRs): we used previously-published HRs from a meta-analysis of 89 European studies of BMI and all-cause mortality undertaken by the Global BMI Mortality Collaboration (GBMC)<sup>23</sup>. To reduce the risk of confounding and reverse causality, the GBMC meta-analysis excluded smokers, those with chronic disease at time of recruitment, and participants who died within the first five years of follow-up. HRs were available for six BMI categories and three age groups (35-49 years,



1  
2  
3 50-69 years, 70-89 years) (Supplementary Table S1), and were based on c.14 years' follow-  
4  
5 up. The PAF calculation was based on comparison of the BMI distribution in 1995 (the  
6  
7 earliest time point available for the Scottish data) and 2008: this covers the period of  
8  
9 considerable increase in obesity in both Scotland and England (discussed further below), and  
10  
11 also broadly fits with both the c.14 year follow-up period on which the HRs calculation was  
12  
13 based, and the later period of stalling improvement in mortality in both countries. PAF was  
14  
15 therefore calculated as:  
16  
17

$$PAF = \frac{[\sum(p_{2008} \text{ BMI category } i \times HR_i) - \sum(p_{1995} \text{ BMI category } i \times HR_i)]}{\sum(p_{2008} \text{ BMI category } i \times HR_i)}$$

18  
19  
20  
21  
22  
23  
24 The 1995 SHeS only sampled adults aged 16-64 years; data for 65-89 years were therefore  
25  
26 estimated from age-specific distributions in 2003 (the first survey that included all adults  
27  
28 aged 16+ years). Sample sizes for the 35-89 age band were approximately 4,000 in SHeS in  
29  
30 both years, and c.9,700 (1995) and c.8,750 (2008) in HSE. Full details of sample sizes and  
31  
32 methods employed to derive data for the older age groups in 1995 are provided in  
33  
34 Supplementary Table S2.  
35  
36

37  
38 PAFs were applied to observed counts of deaths by five-year age band, sex, year, and  
39  
40 country for the period 2016-19 (i.e. the most recent period of the stalling prior to the COVID-  
41  
42 19 pandemic): this enabled calculation and comparison of *observed* mortality rates with  
43  
44 *BMI-adjusted* rates (i.e. excluding deaths attributable to the change in BMI distribution).  
45  
46 These were then further compared with *projected* rates (i.e. the rates that were predicted  
47  
48 had the stalling of improvement not occurred): the latter were calculated for 2011-2019  
49  
50 based on linear trends. Three sets of projections were produced: 1981-based (i.e. based on  
51  
52 the linear trend for 1981-2010), 1991-based and 2001-based. All rates were age-  
53  
54 standardised using the 2013 European Standard Population<sup>29</sup>, and stratified by sex and  
55  
56 country.  
57  
58  
59  
60

1  
2  
3 A range of sensitivity analyses were undertaken. These included the use of survey data for  
4 three-year averages instead of single year points (e.g. 1994-96 average instead of 1995), and  
5  
6 employing different HRs for different age groups in the calculation of the PAFs: the latter  
7  
8 HRs were approximated from a large English study of over 3.5 million adults with c.18 years  
9  
10 follow-up, and which employed similar exclusion criteria as the GBMC study (Supplementary  
11  
12 Table S3)<sup>30</sup>. Those PAFs were also applied to different age groups in the mortality analyses.  
13  
14  
15 Analyses of age-specific trends were undertaken to explore differences in the PAFs between  
16  
17 Scotland and England.  
18  
19

20  
21 An assessment of the scale and direction of any likely bias was informed by reviews of  
22  
23 relevant PAF-based literature.  
24  
25

#### 26 27 *Patient and Public Involvement*

28  
29 Patients and the public were not involved in this study.  
30  
31  
32  
33  
34

## 35 36 **RESULTS**

37  
38 As context to the main results, Figure 1 presents trends in adult obesity prevalence in  
39  
40 Scotland and England between 1995 and 2019. In 1995 the overall prevalence was  
41  
42 approximately 16% in both countries; by 2019 it had increased to 28-29% (with female rates  
43  
44 slightly higher than male rates). However, the biggest increases took place between the mid-  
45  
46 1990s and the late 2000s, with much smaller increases seen in the later period: for example,  
47  
48 for males in England, and males and females in Scotland, prevalence increased by only 1-2  
49  
50 percentage points between 2010 and 2019.  
51  
52  
53

54  
55 [Figure 1 about here]

56  
57 The calculated PAFs by age group and country are shown in Supplementary Table S4. The  
58  
59 age-specific values were broadly similar for both countries with the exception of the oldest  
60

1  
2  
3 age group (70-89 years) where the PAF was small but positive for English data (0.029) and  
4  
5 small but negative (-0.008) for the Scottish data. This is discussed further below.  
6  
7

8  
9 Figures 2 and 3 compare the observed European age-standardised mortality rates (EASRs)  
10  
11 for 35-89 year-olds with the BMI-adjusted EASRs and the 1991-based projected EASRs. Data  
12  
13 are shown separately for males and females in Scotland (Figure 2) and England (Figure 3).  
14  
15 The divergence between projected and observed rates is clear in all cases and has widened  
16  
17 over time; it is greater for males than females. In all cases the gap in each year is reduced by  
18  
19 the BMI-adjusted EARS, but to a greater extent in England than in Scotland.  
20  
21

22 [Figures 2 & 3 about here]  
23  
24

25  
26 Table 1 quantifies the differences shown in Figures 2 and 3 above. It presents the three sets  
27  
28 of EASRs (observed, projected, and BMI-adjusted) as well as a comparison of the observed-  
29  
30 projected gap with the BMI-adjusted-projected gap: this can be interpreted as the amount  
31  
32 of the observed-projected gap that can be potentially attributed to the change in BMI  
33  
34 between 1995 and 2008. Data are shown annually for 2016-19, with – for simplicity –  
35  
36 average figures for the most recent three-year period also presented.  
37  
38

39  
40 This shows that for Scottish males, the average observed EASR for 2017-19 was 1751 (95%  
41  
42 CIs 1729 to 1773). This reduced marginally to 1719 (95% CIs 1697 to 1741) after adjustment  
43  
44 for the change in BMI (in effect, excluding the increase in overweight- and obesity-related  
45  
46 deaths), but was still notably higher than the projected EASR of 1447 (95% CIs 1427 to 1467).  
47

48  
49 The change in BMI therefore potentially 'explained' 10.5% of the difference between the  
50  
51 observed and projected rates. For females, 13.6% of the difference could be attributed in  
52  
53 this manner. However, the figures for England were notably higher: average figures of 20.1%  
54  
55 for males and 35.1% for females.  
56  
57  
58  
59  
60

|                 | Males          |               |                   |                       |                                                                  | Females       |                   |                       |                                                                  |
|-----------------|----------------|---------------|-------------------|-----------------------|------------------------------------------------------------------|---------------|-------------------|-----------------------|------------------------------------------------------------------|
|                 | Year           | Observed rate | BMI-adjusted rate | Projected rate (1991) | % of observed-projected difference attributable to change in BMI | Observed rate | BMI-adjusted rate | Projected rate (1991) | % of observed-projected difference attributable to change in BMI |
| <b>Scotland</b> | 2016           | 1777.7        | 1744.9            | 1565.6                | 15.5%                                                            | 1276.2        | 1257.0            | 1180.3                | 20.0%                                                            |
|                 | 2017           | 1775.7        | 1744.4            | 1506.3                | 11.6%                                                            | 1282.8        | 1263.7            | 1151.6                | 14.5%                                                            |
|                 | 2018           | 1762.1        | 1729.9            | 1447.1                | 10.2%                                                            | 1277.0        | 1257.3            | 1122.8                | 12.8%                                                            |
|                 | 2019           | 1716.3        | 1684.0            | 1387.8                | 9.8%                                                             | 1245.1        | 1224.9            | 1094.1                | 13.4%                                                            |
|                 |                |               |                   |                       |                                                                  |               |                   |                       |                                                                  |
|                 | <i>2017-19</i> | <i>1750.7</i> | <i>1718.8</i>     | <i>1447.1</i>         | <i>10.5%</i>                                                     | <i>1268.0</i> | <i>1248.3</i>     | <i>1122.8</i>         | <i>13.6%</i>                                                     |
| <b>England</b>  | 2016           | 1472.1        | 1411.2            | 1252.0                | 27.7%                                                            | 1042.1        | 1000.1            | 951.1                 | 46.2%                                                            |
|                 | 2017           | 1459.7        | 1399.2            | 1196.3                | 23.0%                                                            | 1029.2        | 987.8             | 923.6                 | 39.2%                                                            |
|                 | 2018           | 1453.1        | 1392.6            | 1140.6                | 19.4%                                                            | 1026.7        | 985.2             | 896.2                 | 31.8%                                                            |
|                 | 2019           | 1404.2        | 1345.7            | 1084.9                | 18.3%                                                            | 985.5         | 945.5             | 868.8                 | 34.2%                                                            |
|                 |                |               |                   |                       |                                                                  |               |                   |                       |                                                                  |
|                 | <i>2017-19</i> | <i>1438.5</i> | <i>1378.6</i>     | <i>1140.6</i>         | <i>20.1%</i>                                                     | <i>1013.5</i> | <i>972.6</i>      | <i>896.2</i>          | <i>34.9%</i>                                                     |

Table 1. Comparison of observed, projected and BMI-adjusted age-standardised mortality rates among 35-89 year-olds, Scotland and England, 2016-19.

1  
2  
3 The gap between the observed and projected EASRs is smaller when using 1981-based  
4 projections, and greater when using 2001-based projections. These are shown in  
5  
6 Supplementary Figures S1 and S2, and quantified further in Supplementary Table S5.  
7  
8  
9

10 The use of the different HRs and different age groups in sensitivity analyses resulted in lower  
11 PAFs (Supplementary Table S6). Consequently, less of the difference between observed and  
12  
13 projected mortality rates could be attributed to changes in BMI than was the case in the  
14  
15 main analyses. For example, the 20.1% figure for males in England shown in Table 1 was  
16  
17 reduced to 16.4% when applied to the same 35-89 age band in the mortality analyses, to  
18  
19 15.1% when applied to 15-84 years, and to 13.2% when applied to 15+ years. Similar  
20  
21 reductions of between approximately a third and a fifth were shown for females in England  
22  
23 (Supplementary Table S7).  
24  
25  
26  
27  
28

29 Additional analyses to explore the difference in the PAFs for the oldest age group in Scotland  
30 (negative) and England (positive) suggested that it was partly explained by a smaller increase  
31  
32 in Grade I obesity in Scotland. In England, the prevalence in this age group increased by 44%  
33  
34 from 13.6% to 19.6% between 1995 and 2008; in Scotland, the prevalence was already  
35  
36 higher in 1995 (20.2%) and only increased marginally to 22.0% in 2008. A greater increase in  
37  
38 Scotland would have resulted in a positive, rather than negative, PAF (data not shown).  
39  
40 Given that the 70-89 years age group was not sampled in the 1995 SHeS, with estimates  
41  
42 instead derived from proportions in the 2003 survey, the accuracy of these figures is  
43  
44 uncertain. However, analyses of long-term trends for this age group showed that trends  
45  
46 have fluctuated between approximately 20% and 24% in most years, and in that context the  
47  
48 derived estimate for 1995 seems plausible (Supplementary Figure S3). Furthermore,  
49  
50 comparison with English trends support the observation of higher Grade I obesity in this age  
51  
52 group: despite considerable fluctuation in rates over time, levels were higher in Scotland in 9  
53  
54 of the 13 available data points between 2003 and 2019 (Supplementary Figure S4).  
55  
56  
57  
58  
59  
60

1  
2  
3 Despite such fluctuations in rates, only marginal differences in results were observed when  
4 using three-year averages rather than single years in the calculation of PAFs across all age  
5 groups (Supplementary Tables S8-S10).  
6  
7  
8  
9

10 The assessment of potential biases is shown in Table 2. Of the ten sources of potential bias  
11 listed, five suggest potential overestimation of effect size, two suggest underestimation, and  
12 the remaining three are unclear. In the majority of cases the size of any bias is either small or  
13 unclear. The implication is that the estimates produced are more likely to be overestimates  
14 of the contribution of obesity rather than underestimation, but this is uncertain.  
15  
16  
17  
18  
19  
20  
21  
22  
23  
24  
25  
26  
27  
28  
29  
30  
31  
32  
33  
34  
35  
36  
37  
38  
39  
40  
41  
42  
43  
44  
45  
46  
47  
48  
49  
50  
51  
52  
53  
54  
55  
56  
57  
58  
59  
60

|   | Source of potential bias                                | Direction                         | Magnitude | Notes                                                                                                                                                                                                                                                                                                                                                                                                                                                                                                                                                                                                                                                                                                                                                                                                                                                                                                                                                   |
|---|---------------------------------------------------------|-----------------------------------|-----------|---------------------------------------------------------------------------------------------------------------------------------------------------------------------------------------------------------------------------------------------------------------------------------------------------------------------------------------------------------------------------------------------------------------------------------------------------------------------------------------------------------------------------------------------------------------------------------------------------------------------------------------------------------------------------------------------------------------------------------------------------------------------------------------------------------------------------------------------------------------------------------------------------------------------------------------------------------|
| 1 | BMI treated as categorical rather than continuous data  | Unclear                           | Small     | The 'proportional shift' method (the use of categorical rather than continuous data in the calculation of attributable fractions) has been shown to be associated with the potential for both underestimation and overestimation of effect size. However, the greater the number of categories, the lower the risk of such uncertainty <sup>31</sup> : we employ a relatively large number (six) of BMI categories.                                                                                                                                                                                                                                                                                                                                                                                                                                                                                                                                     |
| 2 | Declining survey response rates                         | Underestimation of obesity effect | Unclear   | Both surveys are large and deemed nationally representative, and both are weighted to adjust for non-response: however, in the case of the English survey, this weighting was only introduced in 2003, and therefore was not applied to the 1995 data; furthermore, despite the use of such weights, the data may still be potentially affected by a 'healthy respondent' bias <sup>32</sup> . The latter, however, is difficult to quantify.                                                                                                                                                                                                                                                                                                                                                                                                                                                                                                           |
| 3 | Broad age bands with potential for residual confounding | Overestimation of obesity effect  | Unclear   | Some of the change in BMI between the two time periods will be due to ageing, and this may not be captured because of the large age bands employed.                                                                                                                                                                                                                                                                                                                                                                                                                                                                                                                                                                                                                                                                                                                                                                                                     |
| 4 | Exclusion of those aged 16-34 and 90+ years             | Underestimation of obesity effect | Small     | The exclusion of these sections of the adult population would suggest potential underestimation of effect size, especially given that overweight and obesity levels increased among both age groups between 1995 and 2008 <sup>33</sup> . However, the level of underestimation is likely to be small, given the relatively small number of deaths that occur in the younger age group overall, and the likely number of deaths <i>from relevant causes</i> for those aged 90 and above. Furthermore, sensitivity analyses using hazard ratios (HRs) approximated from the Bhaskaran et al study <sup>30</sup> which covered both age groups (the age bands used were 16-49, 50-69, 70-79 and 80+ years) suggested <i>fewer</i> deaths were attributable to the change in BMI than was the case using the HRs for 35-89 year-olds only. The calculated PAF for the 80+ years group was also very small in those analyses (e.g. 0.004 for English data). |
| 5 | Hazard ratios not generalisable to Scotland and England | Overestimation of obesity effect  | Small     | The HRs used in the analyses (from the work published by the Global BMI Mortality Collaboration (GBMC)) were calculated from a meta-analysis of 89 European studies, a considerable number of which were from the UK <sup>23</sup> . Assuming no effect modification from country/study-specific context, the HRs should be appropriate for use in our analyses of UK data, despite the higher levels of overweight and obesity observed in the UK. However,                                                                                                                                                                                                                                                                                                                                                                                                                                                                                            |

|    | Source of potential bias                                              | Direction                        | Magnitude  | Notes                                                                                                                                                                                                                                                                                                                                                                                                                                                                                                                                    |
|----|-----------------------------------------------------------------------|----------------------------------|------------|------------------------------------------------------------------------------------------------------------------------------------------------------------------------------------------------------------------------------------------------------------------------------------------------------------------------------------------------------------------------------------------------------------------------------------------------------------------------------------------------------------------------------------------|
|    |                                                                       |                                  |            | sensitivity analyses using alternative HRs approximated from the study by Bhaskaran et al <sup>30</sup> , which were calculated from data for over 3.5 million adults in England (and based on c.18 year follow-up), resulted in smaller PAFs and therefore fewer deaths attributable to BMI changes over time in England, suggesting the use of the GBMC HRs may have slightly overestimated the effect size.                                                                                                                           |
| 6  | Hazard ratios prone to confounding                                    | Overestimation of obesity effect | Unclear    | HRs from the GBMC study are not adjusted for socioeconomic deprivation, levels of physical activity or diet, and thus represent a likely overestimation of effect size, albeit one that is difficult to quantify.                                                                                                                                                                                                                                                                                                                        |
| 7  | Changes in BMI due to pre-existing ill-health                         | Overestimation of obesity effect | Negligible | By excluding smokers and ex-smokers, those with chronic disease at time of recruitment, and participants who died within the first five years of follow-up, the GBMC study (the HRs from which are used here) largely removed this risk.                                                                                                                                                                                                                                                                                                 |
| 8  | Interpolated data for age 65-89 years in 1995<br>Scottish survey data | Unclear                          | Unclear    | Analyses comparing the estimated figure for 1995 with observed trend data in other years of the survey do not suggest any obvious inaccuracies, and there are no other data from other Scottish surveys that can be compared. However, the PAF for the 70-89 years age group is negative in the Scottish data (-0.008) but positive in the English data (0.028) which contrasts with the other two age groups where the PAFs are very similar in the two data sets. The extent to which this may relate to the interpolation is unknown. |
| 9  | Use of single-year comparison time points in calculation of PAFs      | Unclear                          | Small      | Sensitivity analyses using three year averages (1994-96 instead of 1995, and 2007-09 instead of 2008) suggest a minimal impact.                                                                                                                                                                                                                                                                                                                                                                                                          |
| 10 | Lengthy follow-up period                                              | Overestimation of obesity effect | Unclear    | The potential for overestimation of effect size has been highlighted for studies with long follow-up periods on the basis that important 'mediators' (e.g. systolic blood pressure, cholesterol) may decrease over time among those with initially recorded high BMI <sup>34,35</sup> . It is unclear whether – or to what extent – this may apply here.                                                                                                                                                                                 |

Table 2. Assessment of potential biases in calculation of Population Attributable Fractions (PAFs).



## DISCUSSION

### *Overall findings and implications*

Our analyses suggest that changes in the BMI distribution in Scotland and England between the mid-1990s and late 2000s may have potentially contributed to the mortality changes observed in both countries since around 2012. In Scotland, an estimated 10% (males) and 14% (females) of the difference between observed and predicted mortality rates among 35-89 year-olds in 2017-19 may be attributable to previous changes in BMI. The equivalent figures for England were notably higher: 20% and 35% respectively. However, there is uncertainty around the accuracy of these estimates: sensitivity analyses and bias assessment suggest the potential for overestimation of effect size, although the degree is difficult to quantify.

Alongside the evidence of the role of UK Government austerity measures in the stalling of mortality improvement in Scotland and England<sup>8-14,17,18</sup>, this suggests the need for a range of government policies to both reverse the damaging effects of austerity, as well as to address the negative consequences of an increased obesogenic environment in the UK<sup>36</sup>.

### *Strengths and weaknesses*

A number of limitations of the study are acknowledged. In relation to the survey data sources, these include: the need to derive estimates for older age bands in the 1995 SHeS (although trend analyses suggest the data are plausible); the lack of non-response weighting in the 1995 HSE, as well as the general decline over time in response rates in all such population surveys; and limited time series data (especially in the Scottish survey). Other limitations include the use of the proportional shift method in calculating the PAFS (although data constraints meant no other method was available), the use of age-specific (rather than age *and* sex specific) HRs (the latter were not available), and the lack of any socioeconomic

1  
2  
3 stratification of the analysis: the latter would have been important given that the mortality  
4 changes observed in the UK in the past decade have particularly affected more deprived  
5 populations<sup>2,3-5</sup>. We did not calculate 95% confidence intervals for the PAFs on the basis that  
6 this would have misrepresented the key sources of uncertainty in the analyses, which were  
7 due to a range of potential biases rather than random variation. It was also difficult to find a  
8 means of combining assessment of random variation in each of the underlying data sources  
9 (BMI distribution, mortality, projected mortality, HRs), as well as the PAF estimate, that  
10 would have adequately represented the random variation. Other weaknesses are also  
11 included within Table 2. However, the study also has a number of strengths. Despite their  
12 acknowledged limitations, both the SHES and HSE are important data sources: they are  
13 large, nationally representative, surveys which have collected important measured (not self-  
14 reported) anthropometric data since the 1990s. The other data sources employed in the  
15 analyses were also strengths of the study: detailed mortality data for both countries' whole  
16 populations, and HRs from a comprehensive meta-analysis of a large number of European  
17 studies of BMI (and the design of which minimised the risk of confounding). We also  
18 undertook a range of sensitivity analyses and a detailed assessment of potential biases.

#### 39 *Relevance to other studies*

40  
41  
42 The relationship between obesity and all-cause mortality has been demonstrated in  
43 numerous studies<sup>23</sup>. While the weight of evidence suggests that the association is causal,  
44 there has been considerable debate about both the extent of causality, and the measures  
45 such as PAFs that are used to assess it<sup>34,37-41</sup>. For example, limitations of PAFs (and obesity-  
46 related PAFs in particular) highlighted by Levine<sup>37</sup> include: the flawed nature of 'simple  
47 causal partitioning'; the overlapping nature of exposures in a population meaning that  
48 different PAFs add up to more than 100% (thus, assessing single exposures in isolation is  
49 problematic); the importance of the definition of the exposure, such that a more broadly  
50  
51  
52  
53  
54  
55  
56  
57  
58  
59  
60

1  
2  
3 defined exposure will always increase the size of the PAF (meaning that a high PAF is 'not  
4 necessarily indicative of a better scientific understanding of the causes(s) of disease in the  
5 population than a low PAF'). Flegal and colleagues have echoed many of these sentiments,  
6 also cautioning against interpretations of causality: 'PAFs for obesity may be best considered  
7 as indicators of association'<sup>34</sup>. They supported this argument on the basis of a number of  
8 definitional and methodological issues, including: the importance of how the counterfactual  
9 is defined (with the size of the PAF varying depending on what definition is employed);  
10 potential overestimation in long follow-up studies (as alluded to in Table 2); and important  
11 differences between studies in how obesity-related PAFs are calculated which make  
12 interpretation and comparison of results difficult.  
13  
14  
15  
16  
17  
18  
19  
20  
21  
22  
23  
24  
25

26 Despite these criticisms and pleas for cautious interpretation of PAFs in terms of assessing  
27 causality, obesity-related PAFs have been calculated in many studies. This includes recent  
28 work by Ho and colleagues who calculated and compared obesity and smoking related PAFs  
29 from both data sources employed here: SHeS and HSE<sup>42</sup>. The work suggested that deaths  
30 attributable to obesity increased from 18% to 23% between 2003 and 2017, overtaking the  
31 number of deaths attributable to smoking in the process. Other studies have demonstrated  
32 how different methodological approaches can result in different values of obesity related  
33 PAFs. For example, in the Netherlands Vidra et al generated PAFs ranging from 0.9% to 1.8%  
34 (two-fold variation) for the same population, but based on different formulae<sup>41</sup>. They also  
35 showed that the use of European, rather than global, HRs resulted in a higher PAF – this is  
36 relevant to our own study.  
37  
38  
39  
40  
41  
42  
43  
44  
45  
46  
47  
48  
49  
50

51 Vidra et al's estimates for the Netherlands are clearly much lower than Ho et al's for  
52 Scotland and England. Similarly, a comparative study of older (age 60+ years) English and  
53 Brazilian cohorts generated notably higher PAFs for the former compared to the latter: a PAF  
54 of 5.6% for the English cohort (broadly comparable to the PAF for those aged 50-89 years in  
55  
56  
57  
58  
59  
60

1  
2  
3 the HSE in our study (albeit defined quite differently)) compared to 0.9% for the Brazilian<sup>43</sup>.  
4  
5 Finally, Stringhini et al calculated and compared PAFs for a range of risk factors (including  
6  
7 obesity) from multiple cohorts across the globe<sup>44</sup>. There was a considerable difference  
8  
9 between the male (-5.6%) and female (3.5%) obesity-related PAFs, highlighting a limitation  
10  
11 of our own study in not using sex-specific HRs and PAFs.  
12  
13

### 14 15 *Conclusions*

16  
17 Changes to BMI (including, in particular, increases in obesity) between the mid-1990s and  
18  
19 late 2000s are likely to have made a contribution to the stalled trends in mortality observed  
20  
21 from around 2012 in both Scotland and England. However, a number of uncertainties are  
22  
23 associated with the available data and cautious interpretation of our results is therefore  
24  
25 required. The results are likely to be overestimates: thus the majority of the stalled trends is  
26  
27 explained by other factors, most likely austerity policies. Action is therefore urgently needed  
28  
29 to address both issues: to protect the income (and therefore the health) of the poorest and  
30  
31 most vulnerable in society, and to counter the negative consequences, and the structural  
32  
33 and commercial determinants, of the obesogenic environment in the UK.  
34  
35  
36  
37  
38

39 (3,039 words (excluding tables))  
40

### 41 **FIGURE CAPTIONS**

42  
43  
44 Figure 1. Trends in the percentage of adults (aged 16+ years) classed as obese (BMI 30+),  
45  
46 Scotland (from the Scottish Health Survey (SHeS)) and England (from the Health Survey for  
47  
48 England), 1995-2019.  
49

50  
51  
52 Figure 2. Observed, predicted and BMI-adjusted European age-standardised mortality rates  
53  
54 (EASRs), Scotland 1991-2019. Note different y-axis scales for males and females.  
55

56  
57 Figure 3. Observed, predicted and BMI-adjusted European age-standardised mortality rates  
58  
59 (EASRs), England 1991-2019. Note different y-axis scales for males and females.  
60

**What is already known on this subject?**

- Concerning changes in mortality rates have been observed across the UK since the early 2010s: a stalling of improvement overall, and increasing death rates among socioeconomically deprived populations.
- While UK Government austerity measures have been shown to be the most likely explanation, prior increases in obesity levels have also been proposed as a potential contributory factor.

**What this study adds?**

- For the first time, we quantify the potential contribution of increasing obesity levels to the changes in overall mortality in Scotland and England.
- In Scotland 10% (males) and 14% (females) of the difference between observed and predicted mortality rates in 2017-19 may be attributable to prior increases in obesity.
- In England the figures are notably larger: 20% and 35% respectively.

## ACKNOWLEDGEMENTS

We are grateful to the organisations who supplied the required data: National Records of Scotland (NRS); the Office for National Statistics (ONS); and the UK Data Service (for access to the Scottish Health Survey and Health Survey for England data). Particular thanks also to Prof. Krishnan Bhaskeran at the London School of Hygiene and Tropical Medicine for assistance in accessing the data for some of the sensitivity analyses.

## DECLARATIONS

**Funding:** No specific funding was obtained for this work. GM has recently received funding from the WHO.

**Contributions:** The study was conceived jointly between GM, ET and DW. The research questions and analysis plan were agreed by all authors. DW undertook all analyses and drafted the manuscript. All authors provided substantial critical input to improve the manuscript and all authors approved the final draft.

**Competing interests:** None declared

**Ethical approval:** None required (we use secondary data sets: mortality and population counts, and published national survey data).

**Data availability:** No additional data available

**REFERENCES**

- <sup>1</sup> Hiam L., Harrison D., McKee M., Dorling D. Why is life expectancy in England and Wales 'stalling'? *Journal of Epidemiology & Community Health* 2018; 72: 404-408.
- <sup>2</sup> Fenton L., Wyper G.M., McCartney G., Minton, J. Socioeconomic inequality in recent adverse all-cause mortality trends in Scotland *Journal of Epidemiology & Community Health* 2019; 73: 971-974
- <sup>3</sup> Walsh D., McCartney G., Minton J., Parkinson J., Shipton D., Whyte B. Changing mortality trends in countries and cities of the UK: a population-based trend analysis. *BMJ Open* 2020; 10: e038135
- <sup>4</sup> Currie J, Boyce T, Evans L, Luker M et al. Life expectancy inequalities in Wales before COVID-19: an exploration of current contributions by age and cause of death and changes between 2002 and 2018. *Public Health*. 2021 Mar 15;193:48-56.
- <sup>5</sup> Rashid T, Bennett JE, Paciorek CJ, et al. Life expectancy and risk of death in 6791 communities in England from 2002 to 2019: high-resolution spatiotemporal analysis of civil registration data. *Lancet Public Health* 2021; 6(11): e805-e816.
- <sup>6</sup> Ramsay J., Minton J., Fischbacher C., Fenton L. et al. How have changes in death by cause and age group contributed to the recent stalling of life expectancy gains in Scotland? Comparative decomposition analysis of mortality data, 2000-2002 to 2015-2017. *BMJ Open* 2020; 10 (10):e036529
- <sup>7</sup> Public Health England (PHE). A review of recent trends in mortality in England. London: PHE; 2018
- <sup>8</sup> McCartney G., Walsh D., Fenton L., Devine R. Resetting the course for population health: evidence and recommendations to address stalled mortality improvements in Scotland and the rest of the UK. Glasgow: Glasgow Centre for Population Health/University of Glasgow; 2022. Available from: [https://www.gcph.co.uk/assets/0000/8723/Stalled\\_Mortality\\_report\\_FINAL\\_WEB.pdf](https://www.gcph.co.uk/assets/0000/8723/Stalled_Mortality_report_FINAL_WEB.pdf) (Accessed June 2022)
- <sup>9</sup> Richardson E, Fenton L, Parkinson J, Pulford A, Taulbut M, McCartney G, Robinson M. The effect of income-based policies on mortality inequalities in Scotland: a modelling study. *Lancet Public Health* 2020: e150-e156..
- <sup>10</sup> Alexiou A, Fahy K, Mason K. et al. Local government funding and life expectancy in England: a longitudinal ecological study. *Lancet Public Health* 2021; 6(9): e641-e647.
- <sup>11</sup> Martin S., Longo F., Lomas J., Claxton K. Causal impact of social care, public health and healthcare expenditure on mortality in England: cross-sectional evidence for 2013/2014. *BMJ Open* 2021; 11(10): e046417
- <sup>12</sup> Koltai J., McKee M., Stuckler D. Association between disability-related budget reductions and increasing drug-related mortality across local authorities in Great Britain. *Social Science & Medicine* 2021; 284: 114225
- <sup>13</sup> Dorling, D. Austerity and Mortality. In: Cooper V., Whyte D. *The Violence of Austerity*, London: Pluto Press; 2017.

- 1  
2  
3  
4  
5  
6  
7  
8  
9  
10  
11  
12  
13  
14  
15  
16  
17  
18  
19  
20  
21  
22  
23  
24  
25  
26  
27  
28  
29  
30  
31  
32  
33  
34  
35  
36  
37  
38  
39  
40  
41  
42  
43  
44  
45  
46  
47  
48  
49  
50  
51  
52  
53  
54  
55  
56  
57  
58  
59  
60
- <sup>14</sup> Stuckler D., Reeves A., Loopstra R., Karanikolos M., McKee M. Austerity and health: the impact in the UK and Europe. *Eur J Public Health*. 2017; 27(suppl\_4):18–21.
- <sup>15</sup> Rajmil L., Fernández de Sanmamed M-J. Austerity Policies and Mortality Rates in European Countries, 2011–2015. *American Journal of Public Health* 2019; 109: 768-770
- <sup>16</sup> Toffolutti V., Suhrcke M. Does austerity really kill? *Economics & Human Biology* 2019; 33: 211-22
- <sup>17</sup> Broadbent P., McCartney G., Walsh D., Katikireddi S.V., Gallagher C. Is austerity responsible for the stalled mortality trends across many high-income countries? A systematic review. Submitted for publication.
- <sup>18</sup> McCartney G., McMaster R., Popham F., Dundas R., Walsh D. Is austerity a cause of slower improvements in mortality in high income countries? Submitted for publication.
- <sup>19</sup> Raleigh VS. Stalling life expectancy in the UK. *BMJ* 2018; 362 :k4050.
- <sup>20</sup> Preston SH, Vierboom YC, Stokes A. The role of obesity in exceptionally slow US mortality improvement. *Proc Natl Acad Sci* 2018; 115(5): 957-961.
- <sup>21</sup> Adair T, Lopez AD. The role of overweight and obesity in adverse cardiovascular disease mortality trends: an analysis of multiple cause of death data from Australia and the USA. *BMC Medicine* 2020; 18(1): 199.
- <sup>22</sup> Lopez AD, Adair T. Is the long-term decline in cardiovascular-disease mortality in high-income countries over? Evidence from national vital statistics. *Int J Epidemiol* 2019; 48(6): 1815-1823.
- <sup>23</sup> Global BMI Mortality Collaboration. Body-mass index and all-cause mortality: individual-participant-data meta-analysis of 239 prospective studies in four continents. *Lancet* 2016; 388(10046): 776-86
- <sup>24</sup> Foresight. Tackling Obesities: Future Choices - Project Report (2nd edition). London, UK Government Office for Science, 2007.
- <sup>25</sup> Joint Health Surveys Unit of Social and Community Planning Research and University College London. Scottish Health Survey 1995 (4th Edition). Colchester, Essex: UK Data Archive; 2018. SN: 3807, <http://doi.org/10.5255/UKDA-SN-3807-2>
- <sup>26</sup> University College London, Department of Epidemiology and Public Health, Scottish Centre for Social Research. Scottish Health Survey 2008 (4th Edition). UK Data Service; 2021. SN: 6383, <http://doi.org/10.5255/UKDA-SN-6383-4>
- <sup>27</sup> Higgins V., Marshall, A. Health Survey for England Time Series Dataset, 1991-2009. Colchester, Essex: UK Data Archive; 2012. SN: 7025.
- <sup>28</sup> Mansournia A. M., Altman D.G. Population attributable fraction. *BMJ* 2018; 360:k757
- <sup>29</sup> European Commission. Revision of the European Standard Population - Report of Eurostat's task force. Luxembourg: Publications Office of the European Union; 2013. Available from: <https://ec.europa.eu/eurostat/documents/3859598/5926869/KS-RA-13-028-EN.PDF/e713fa79-1add-44e8-b23d-5e8fa09b3f8f> (Accessed June 2022)



- 1  
2  
3  
4  
5  
6  
7  
8  
9  
10  
11  
12  
13  
14  
15  
16  
17  
18  
19  
20  
21  
22  
23  
24  
25  
26  
27  
28  
29  
30  
31  
32  
33  
34  
35  
36  
37  
38  
39  
40  
41  
42  
43  
44  
45  
46  
47  
48  
49  
50  
51  
52  
53  
54  
55  
56  
57  
58  
59  
60
- <sup>30</sup> Bhaskaran K., Dos-Santos-Silva I., Leon D.A., Douglas I.J., Smeeth L. Association of BMI with overall and cause-specific mortality: a population-based cohort study of 3.6 million adults in the UK. *Lancet Diabetes Endocrinol.* 2018; 6(12): 944-953
- <sup>31</sup> Barendregt JJ, Veerman JL. Categorical versus continuous risk factors and the calculation of potential impact fractions. *J Epidemiol Community Health.* 2010 Mar;64(3):209-12.
- <sup>32</sup> Gray L., Gorman E., White I.R. et al. Correcting for non-participation bias in health surveys using record-linkage, synthetic observations and pattern mixture modelling. *Statistical Methods in Medical Research* 2020; 29(4): 1212-1226.
- <sup>33</sup> Moody A. Health Survey for England 2019: Adult and child overweight and obesity. Available from: <https://digital.nhs.uk/data-and-information/publications/statistical/health-survey-for-england/2019> (Accessed June 2022)
- <sup>34</sup> Flegal K.M., Panagiotou O.A., Graubard B.I. Estimating population attributable fractions to quantify the health burden of obesity. *Annals of Epidemiology* 2015; 25(3): 201-7
- <sup>35</sup> Danaei G., Ding E.L., Mozaffarian D., Taylor B., Rehm J., Murray C.J., Ezzati M. The preventable causes of death in the United States: comparative risk assessment of dietary, lifestyle, and metabolic risk factors. *PLoS Medicine* 2009; 6(4): e1000058
- <sup>36</sup> Foresight. Tackling Obesities: Future Choices - Project Report (2nd edition). London, UK Government Office for Science, 2007.
- <sup>37</sup> Levine B.J. The other causality question: estimating attributable fractions for obesity as a cause of mortality. *International Journal of Obesity* 2008; 32:S4-7
- <sup>38</sup> McHugh M.D. Fit or fat? A review of the debate on deaths attributable to obesity. *Public Health Nursing* 2006; 23(3): 264-70
- <sup>39</sup> Hernán M.A., Taubman S.L. Does obesity shorten life? The importance of well-defined interventions to answer causal questions. *International Journal of Obesity* 2008;32: S8-14
- <sup>40</sup> Poole C. A history of the population attributable fraction and related measures. *Annals of Epidemiology* 2015; 25(3): 147-54
- <sup>41</sup> Vidra N., Bijlsma M.J., Janssen F. Impact of Different Estimation Methods on Obesity-Attributable Mortality Levels and Trends: The Case of The Netherlands. *Int J Environ Res Public Health* 2018; 15(10):2146
- <sup>42</sup> Ho F.K., Celis-Morales C., Petermann-Rocha F., Parra-Soto S.L., Lewsey J., Mackay D., Pell J.P. Changes over 15 years in the contribution of adiposity and smoking to deaths in England and Scotland. *BMC Public Health* 2021; 21(1): 169
- <sup>43</sup> Kessler M., Thumé E., Scholes S., Marmot M. et al. Modifiable risk factors for 9-year mortality in older English and Brazilian adults: the ELSA and SIGa-Bagé ageing cohorts. *Sci Rep* 2020; 10(1): 4375
- <sup>44</sup> Stringhini S., Carmeli C., Jokela M., Avendaño M. et al. Socioeconomic status and the 25 × 25 risk factors as determinants of premature mortality: a multicohort study and meta-analysis of 1.7 million men and women. *Lancet* 2017; 389(10075): 1229-1237

% of adults classed as obese, Scotland 1995-2019  
Source: Scottish Health Survey

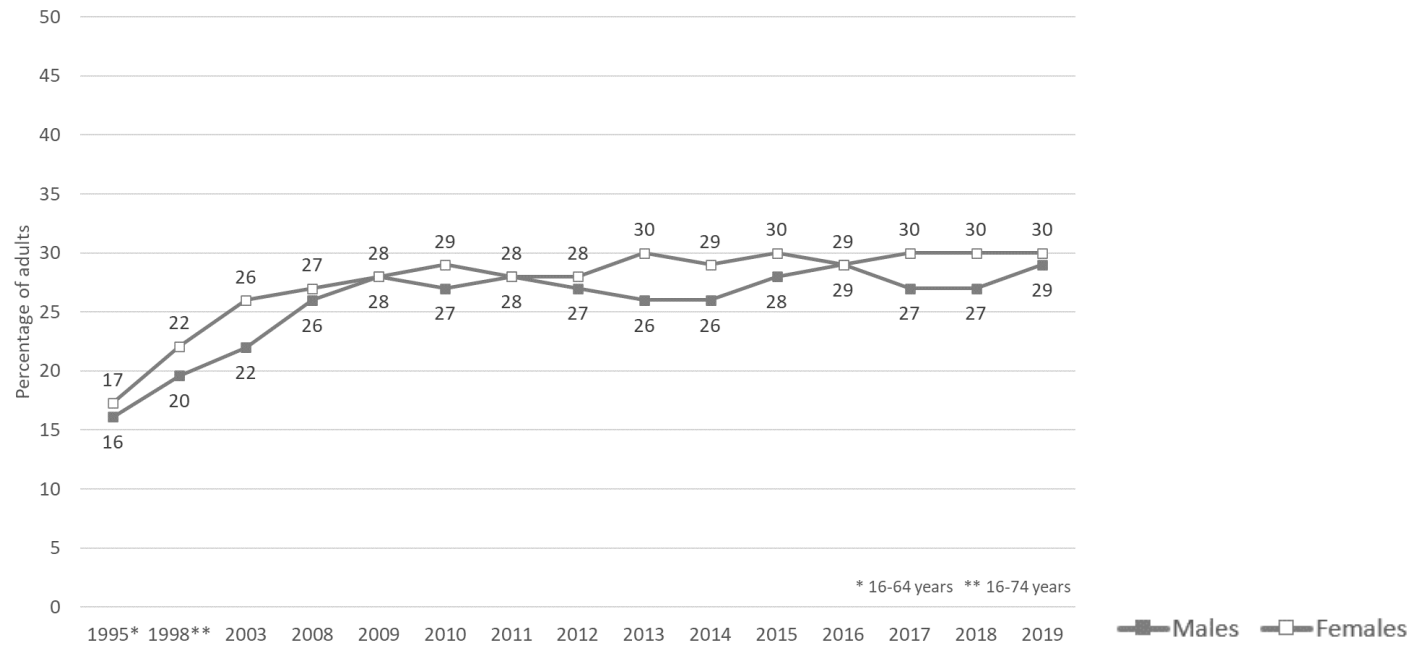

b) England

% of adults classed as obese, England 1995-2019  
Source: Health Survey for England

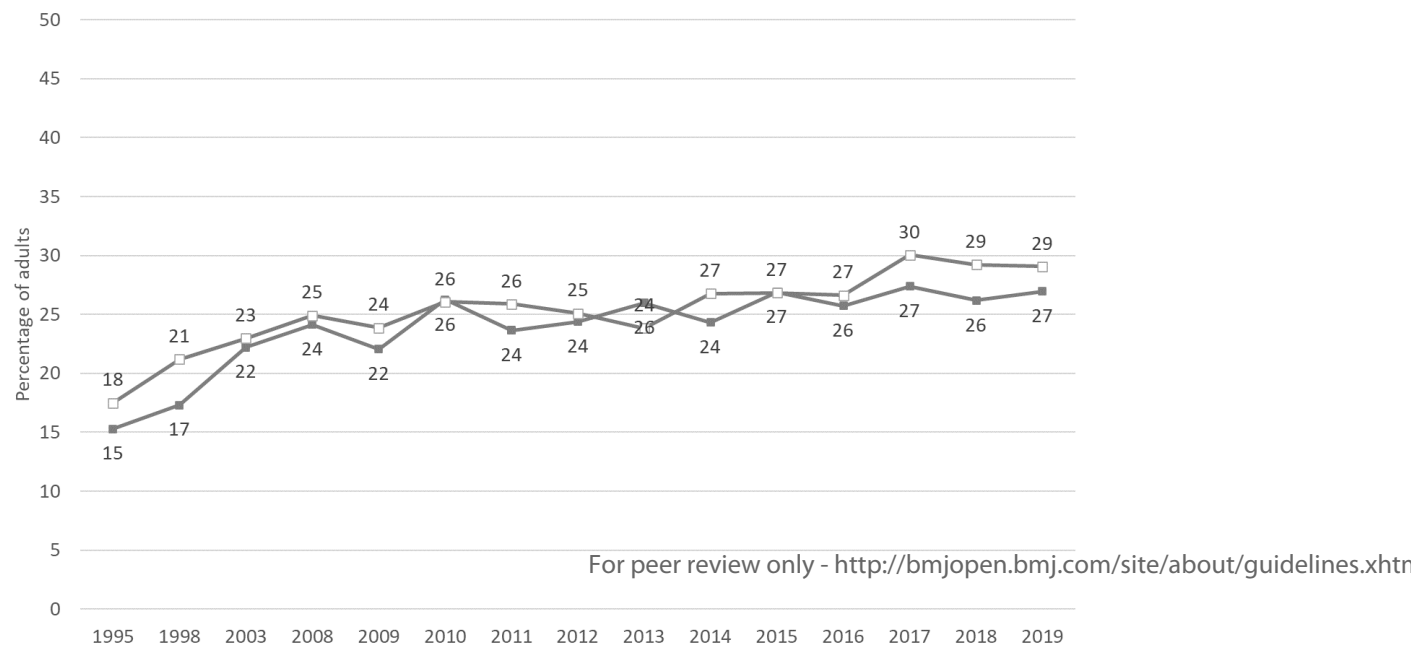

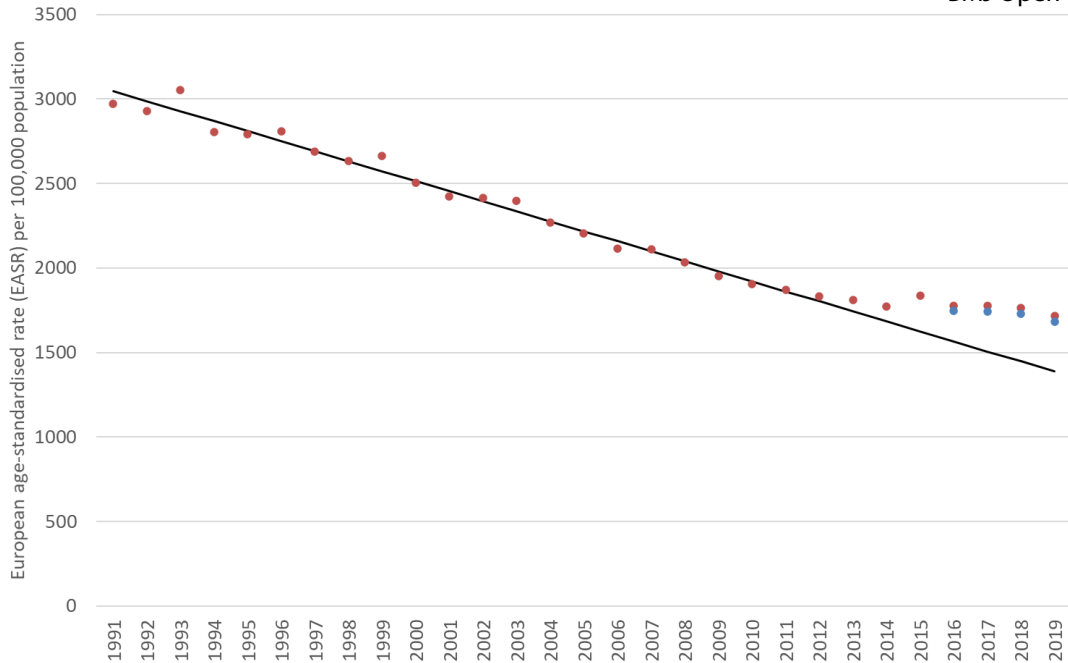

- Observed rate
- Predicted rate
- BMI-adjusted rate

b) Females

Females, 35-89 years, Scotland

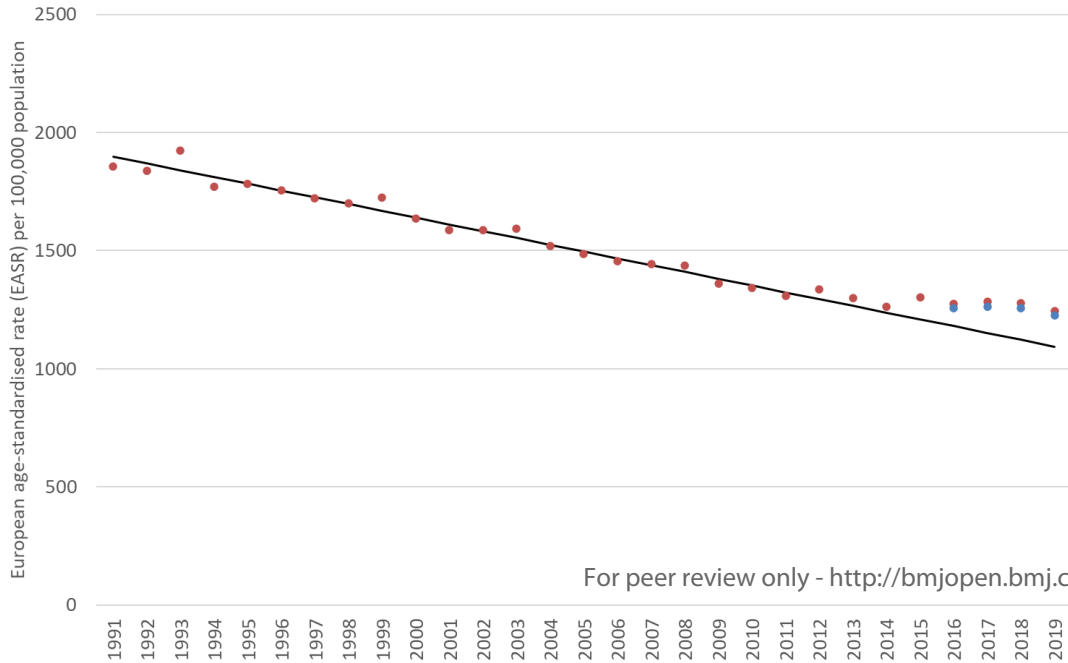

1  
2  
3  
4  
5  
6  
7  
8  
9  
10  
11  
12  
13  
14  
15  
16  
17  
18  
19  
20  
21  
22  
23  
24  
25  
26  
27  
28  
29  
30  
31  
32  
33  
34  
35  
36  
37  
38  
39  
40  
41

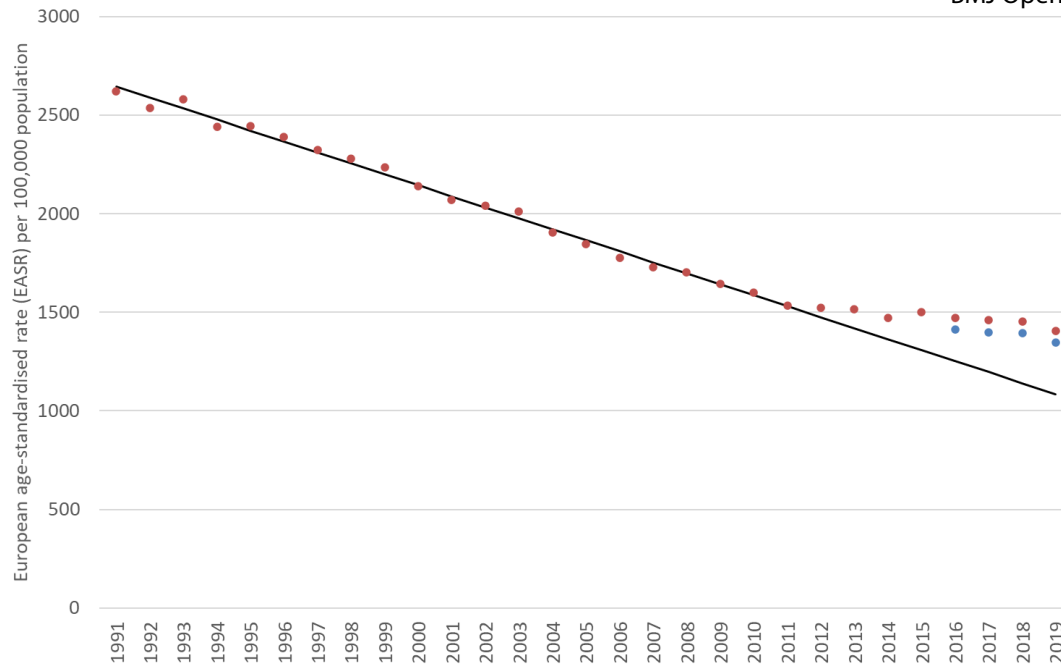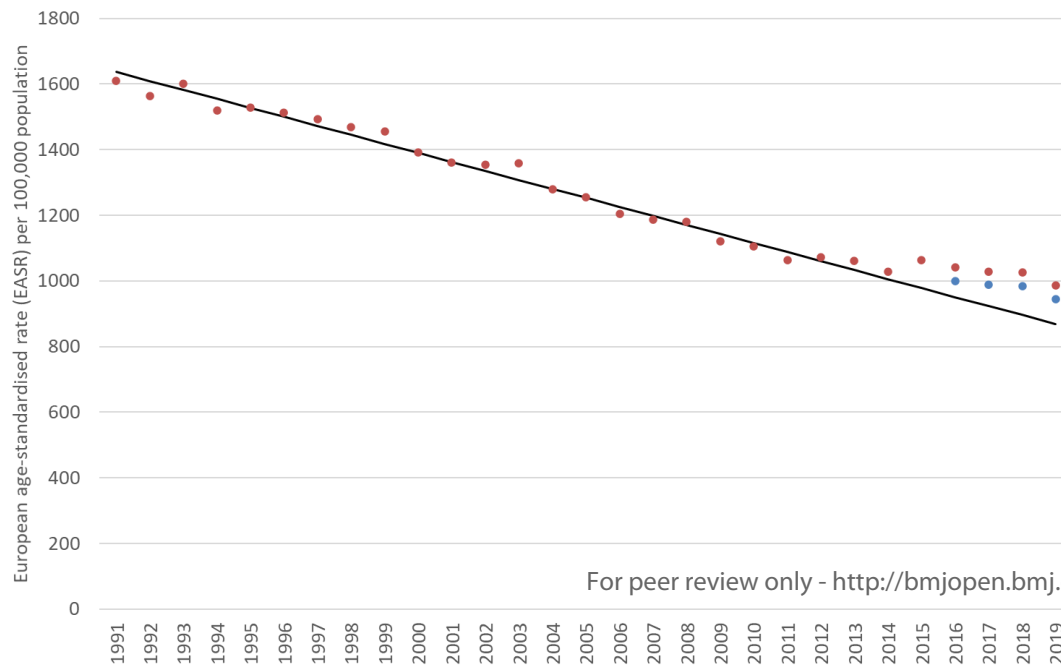

- Observed rate
- Predicted rate
- BMI-adjusted rate

1  
2  
3  
4  
5  
6  
7  
8  
9  
10  
11  
12  
13  
14  
15  
16  
17  
18  
19  
20  
21  
22  
23  
24  
25  
26  
27  
28  
29  
30  
31  
32  
33  
34  
35  
36  
37  
38  
39  
40  
41

1  
2  
3  
4  
5  
6  
7  
8  
9  
10  
11  
12  
13  
14  
15  
16  
17  
18  
19  
20  
21  
22  
23  
24  
25  
26  
27  
28  
29  
30  
31  
32  
33  
34  
35  
36  
37  
38  
39  
40  
41  
42  
43  
44  
45  
46  
47  
48  
49  
50  
51  
52  
53  
54  
55  
56  
57  
58  
59  
60

**Online appendix**

For peer review only

## Supplementary tables

### Supplementary Table S1.

Hazard ratios for BMI categories by age group from The Global BMI Mortality Collaboration (GBMC) 2016 study<sup>1</sup>. Taken from eTable 11 (European studies only).

| Age group (years) | Underweight (BMI 15 to <18.5) | Normal weight (BMI 18.5 to <25) | Overweight (BMI 25 to <30) | Obesity Grade I (BMI 30 to <35) | Obesity Grade II (BMI 35 to <40) | Obesity Grade III (BMI 40 to <60) |
|-------------------|-------------------------------|---------------------------------|----------------------------|---------------------------------|----------------------------------|-----------------------------------|
| 35-49             | 1.86                          | 1.00                            | 1.17                       | 1.90                            | 3.01                             | 5.34                              |
| 50-69             | 2.25                          | 1.00                            | 1.11                       | 1.60                            | 2.23                             | 4.04                              |
| 70-89             | 1.65                          | 1.00                            | 0.98                       | 1.12                            | 1.56                             | 1.91                              |

### Supplementary Table S2.

Sample sizes for 35-89 year-olds in 1995 and 2008, Scottish Health Survey (SHeS) and Health Survey for England (HSE).

| Age group | SHeS 1995      | SHeS 2008 | HSE 1995 | HSE 2008 |
|-----------|----------------|-----------|----------|----------|
| 35-49     | 2,381          | 1,532     | 3,918    | 3,547    |
| 50-69*    | 1,801          | 1,628     | 3,973    | 3,692    |
| 70-89     | 0 <sup>†</sup> | 669       | 1,831    | 1,507    |
| Total     | 4,182          | 3,829     | 9,722    | 8,746    |

*Methodological note: BMI category proportions for 65-69 and 70-89 years for 1995 SHeS (which only sampled 16-64 years) were derived from analysis of 2003 SHeS data (the first survey that included a sample of all adults aged 16+). Thus, for each BMI category the difference in proportions between 15-64 years and 15-69 years in 2003 were applied to 1995 data for 15-64 years to give a likely estimate for 15-69 years. Similarly, the differences in each category between 50-69 years and 70-89 years in the 2003 survey were then applied to 1995 data to provide an estimate for 70-89 years.*

\* 50-64 years in 1995 SHeS: in 2003 SHeS there were 1,975 in this age group, including 1,573 in the 50-64 group (as described above, these data were used to derive estimates for 1995)

<sup>†</sup> Sample size in 2003 SHeS (used to derive estimates for 1995) was 779.

**Supplementary Table S3.**

Hazard ratios for BMI categories by age group approximated from Bhaskaran et al<sup>2</sup> (sensitivity analyses).

| Age group (years) | Underweight (BMI 15 to <18.5) | Normal weight (BMI 18.5 to <25) | Overweight (BMI 25 to <30) | Obesity Grade I (BMI 30 to <35) | Obesity Grade II (BMI 35 to <40) | Obesity Grade III (BMI 40 to <60) |
|-------------------|-------------------------------|---------------------------------|----------------------------|---------------------------------|----------------------------------|-----------------------------------|
| 16-49             | 1.73                          | 1.00                            | 1.27                       | 1.65                            | 2.31                             | 2.84                              |
| 50-69             | 1.79                          | 1.00                            | 1.12                       | 1.43                            | 1.89                             | 2.54                              |
| 70-79             | 1.88                          | 1.00                            | 1.03                       | 1.27                            | 1.63                             | 2.34                              |
| 80+               | 1.25                          | 1.00                            | 0.96                       | 1.07                            | 1.24                             | 1.56                              |

*Methodological note: HRs by age group for the same BMI categories used in the GBMC paper were not available. Instead, values were approximated from the Bhaskaran et al paper's Figure 3b ('Association between BMI and all-cause mortality among never-smokers by age') using Digitizeit software ([www.digitizeit.de](http://www.digitizeit.de)): the latter enabled extraction of approximate data values from the Figure. For each BMI category, the mid-point of the associated HR range was used; this was done separately for each age group<sup>†</sup>. As the Figure presented logHR values, the extracted data were also exponentiated.*

**Supplementary Table S4.**

Population attributable fractions (PAFs) by age group (main analyses).

| Age group (years) | Scotland (SHeS) | England (HSE) |
|-------------------|-----------------|---------------|
| 35-49             | 0.116           | 0.115         |
| 50-69             | 0.071           | 0.071         |
| 70-89             | -0.008          | 0.028         |

<sup>†</sup> Note that for the highest BMI category (Grade III obesity), the mid-point between BMI 40 and the maximum BMI value was used (as BMI values did not exceed 50 in the sample).

**Supplementary Table S5.**

Comparison of main analyses using 1981-, 1991- and 2001-based mortality projections (2017-19 mortality data)

|                   | <b>Observed rate</b> | <b>BMI-adjusted rate</b> | <b>Projected rate (1981)</b> | <b>% of observed-projected difference attributable to BMI change</b> | <b>Projected rate (1991)</b> | <b>% of observed-projected difference attributable to BMI change</b> | <b>Projected rate (2001)</b> | <b>% of observed-projected difference attributable to BMI change</b> |
|-------------------|----------------------|--------------------------|------------------------------|----------------------------------------------------------------------|------------------------------|----------------------------------------------------------------------|------------------------------|----------------------------------------------------------------------|
| Scotland, males   | 1750.7               | 1718.8                   | 1503.7                       | 12.9%                                                                | 1447.1                       | 10.5%                                                                | 1423.7                       | 9.8%                                                                 |
| Scotland, females | 1268.0               | 1248.3                   | 1147.4                       | 16.3%                                                                | 1122.8                       | 13.6%                                                                | 1106.7                       | 12.2%                                                                |
| England, males    | 1438.5               | 1378.6                   | 1183.9                       | 23.5%                                                                | 1140.6                       | 20.1%                                                                | 1143.8                       | 20.3%                                                                |
| England, females  | 1013.5               | 972.6                    | 927.4                        | 47.5%                                                                | 896.2                        | 34.9%                                                                | 847.6                        | 24.7%                                                                |



**Supplementary Table S6.**

Population attributable fractions (PAFs) by age group using HRs approximated from Bhaskaran et al (sensitivity analyses).

| Age group (years) | Scotland (SHeS) | England (HSE) |
|-------------------|-----------------|---------------|
| 16-49             | 0.069           | 0.055         |
| 50-69             | 0.050           | 0.046         |
| 70-79             | 0.026           | 0.043         |
| 80+               | -0.077          | 0.004         |

**Supplementary Table S7.**

Comparison of main results with sensitivity analyses using PAFs calculated from HRs approximated from Bhaskaran et al and applied to different age-specific mortality analyses, England 2017-19 (and using 1991-based mortality projections).

*Methodological note: the PAFs shown in Table S6 above were applied to different age groups in the mortality analysis. For direct comparison with the main results, they were applied to the same 35-89 age band. However, as HRs were available for ages 16-80+ years, they were additionally applied to mortality data with corresponding ages (15 years+, as mortality data were accessed in five year age bands). Further sensitivity analyses restricted the age group to 15-84 years. Results are shown below for England only.*

|         | % observed-projected difference attributable to BMI change |                                  |                                  |                                |
|---------|------------------------------------------------------------|----------------------------------|----------------------------------|--------------------------------|
|         | Main analyses (35-89 years using GBMC HRs)                 | Bhaskaran et al HRs, 35-89 years | Bhaskaran et al HRs, 15-84 years | Bhaskaran et al HRs, 15+ years |
| Males   | 20.1%                                                      | 16.4%                            | 15.1%                            | 13.2%                          |
| Females | 34.9%                                                      | 28.9%                            | 25.9%                            | 22.9%                          |

**Supplementary Table S8.**

Population attributable fractions (PAFs) by age group using three-year averages instead of single years (sensitivity analyses).

*Methodological note: for English data, comparisons were made between the single year approach (i.e. the change in BMI distribution between 1995 and 2008) and three year averages around those single years (i.e. 1994-96 and 2007-09). This was not possible for Scottish data: there were no surveys run in 1994, 1996 or 2007; thus, comparisons were instead made between 1995 and 2008, and 1995 and 2008-10.*

| Age group (years) | Scotland (SHeS) 1995 and 2008-10 | England (HSE), using 1994-96 and 2007-09 |
|-------------------|----------------------------------|------------------------------------------|
| 35-49             | 0.124                            | 0.108                                    |
| 50-69             | 0.076                            | 0.072                                    |
| 70-89             | -0.006                           | 0.023                                    |

**Supplementary Table S9.**

Comparison of main results with sensitivity analyses using PAFs derived from 2008-10 instead of 2008 in the Scottish Health Survey, and applied to analyses of 2017-19 Scottish mortality data (using 1991-based mortality projections).

See methodological note for Supplementary Table S8.

|         | Observed rate | Projected rate (1991) | Main analyses (1995 and 2008) |                                                               | Sensitivity analyses (1995 and 2008-10) |                                                               |
|---------|---------------|-----------------------|-------------------------------|---------------------------------------------------------------|-----------------------------------------|---------------------------------------------------------------|
|         |               |                       | BMI-adjusted rate             | % of observed-projected difference attributable to BMI change | BMI-adjusted rate                       | % of observed-projected difference attributable to BMI change |
| Males   | 1750.7        | 1447.1                | 1718.8                        | 10.5%                                                         | 1713.1                                  | 12.4%                                                         |
| Females | 1268.0        | 1122.8                | 1248.3                        | 13.6%                                                         | 1244.4                                  | 16.3%                                                         |

**Supplementary Table 10.**

See methodological note for Supplementary Table S8.

Comparison of main results with sensitivity analyses using PAFs derived from 1994-96 and 2007-09 instead of 1995 and 2008 respectively in the Health Survey for England, and applied to analyses of 2017-19 English mortality data (using 1991-based mortality projections)

|         | Observed rate | Projected rate (1991) | Main analyses (1995 and 2008) |                                                               | Sensitivity analyses (1994-96 and 2007-09) |                                                               |
|---------|---------------|-----------------------|-------------------------------|---------------------------------------------------------------|--------------------------------------------|---------------------------------------------------------------|
|         |               |                       | BMI-adjusted rate             | % of observed-projected difference attributable to BMI change | BMI-adjusted rate                          | % of observed-projected difference attributable to BMI change |
| Males   | 1438.5        | 1140.6                | 1378.6                        | 20.1%                                                         | 1383.8                                     | 18.4%                                                         |
| Females | 1013.5        | 896.2                 | 972.6                         | 34.9%                                                         | 976.3                                      | 31.7%                                                         |

Supplementary Figures

Supplementary Figure S1.

Observed, predicted and BMI-adjusted European age-standardised mortality rates (EASRs), Scotland 1981-2019 – comparing 1981-, 1991- and 2001-based predictions. Note different y-axis scales for males and females.

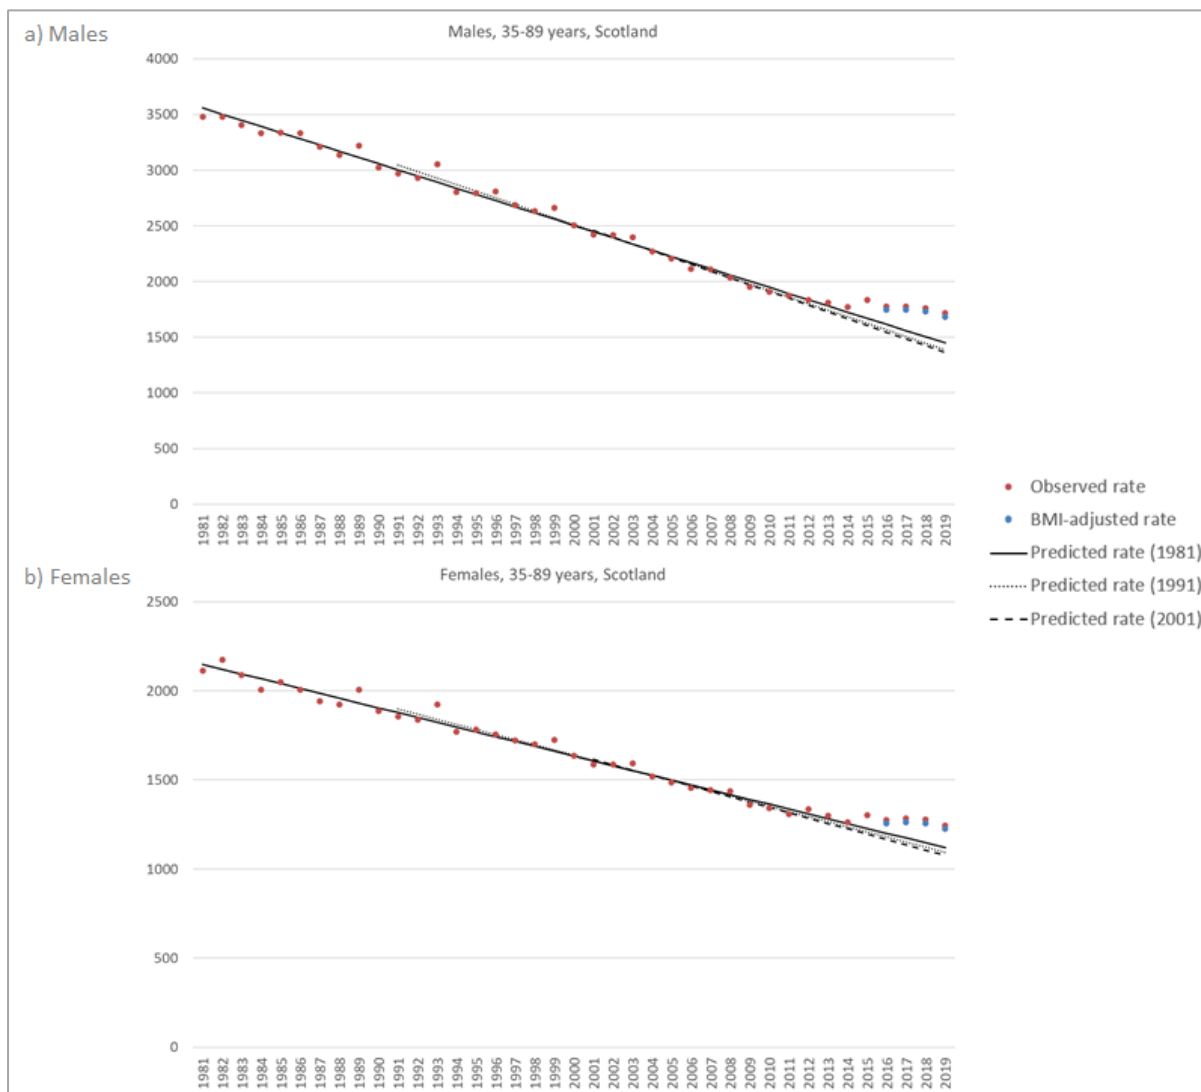

Supplementary Figure S2.

Observed, predicted and BMI-adjusted European age-standardised mortality rates (EASRs), Scotland 1981-2019 – comparing 1981-, 1991- and 2001-based predictions. Note different y-axis scales for males and females.

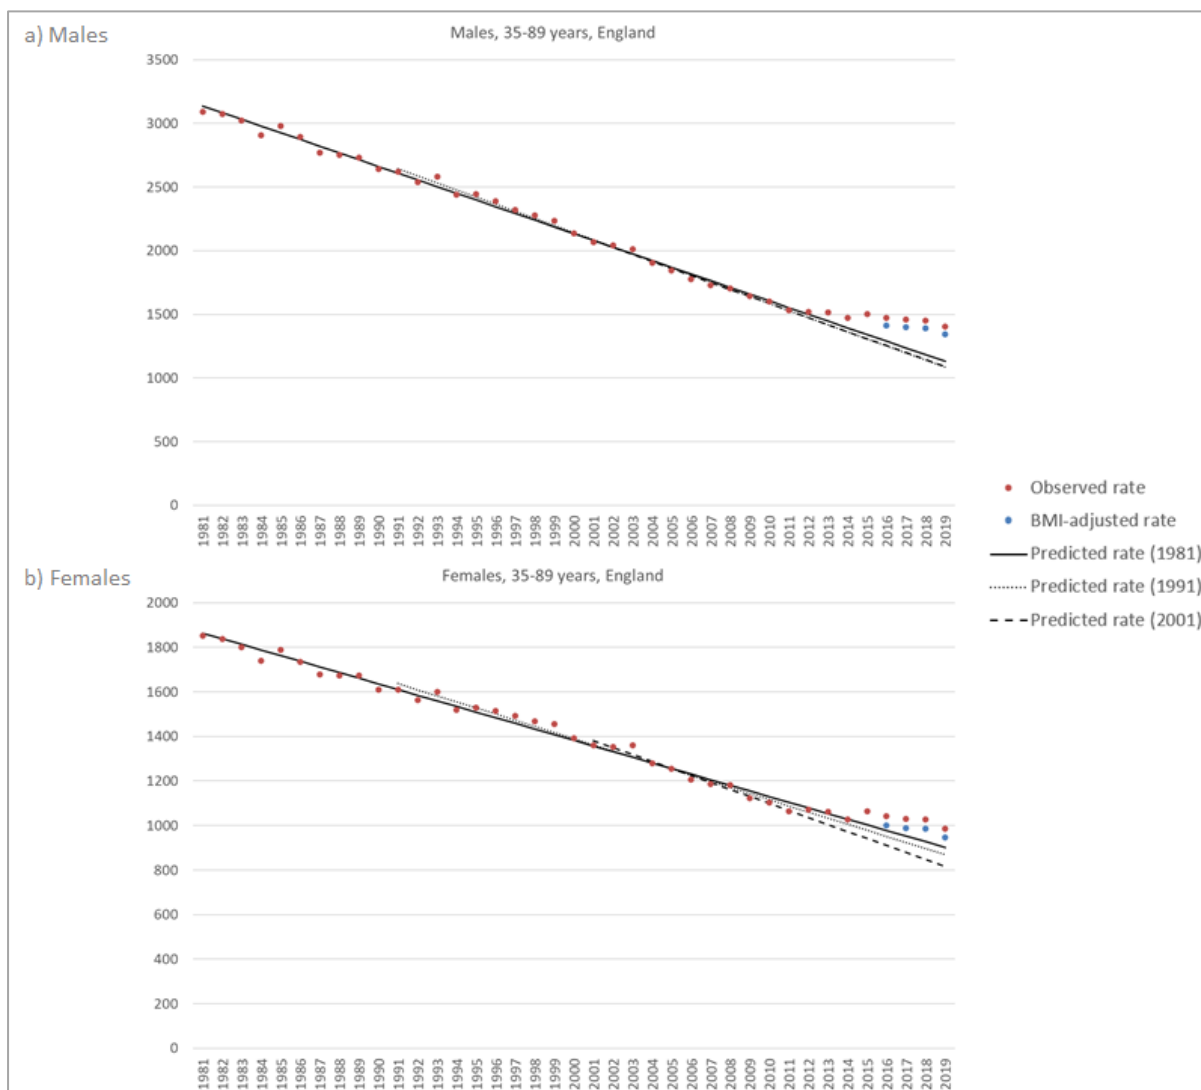

**Supplementary Figure S3.**

Trends in the percentage of adults aged 70-89 years classed as Obese Grade I (BMI 30 to <35), Scotland, 1995-2019

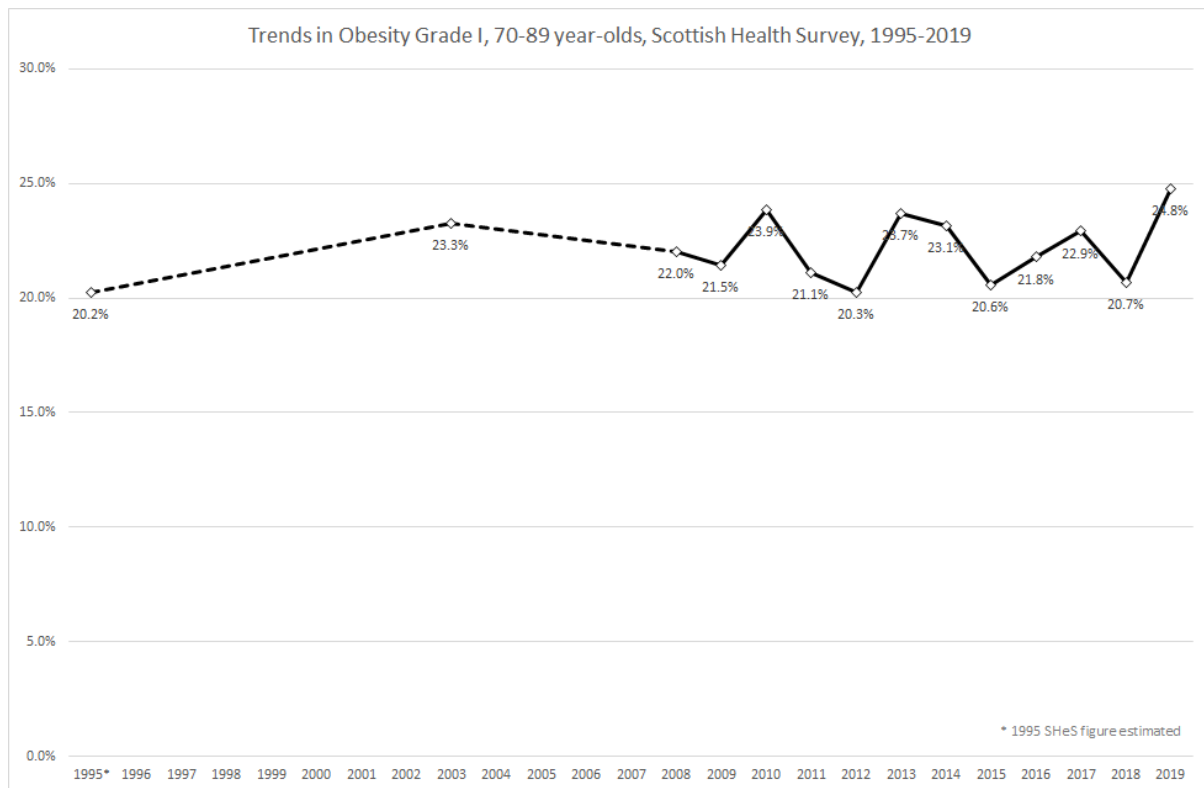

Supplementary Figure S4.

Trends in the percentage of adults aged 70-89 years in different BMI categories, Scotland and England, 1995-2019

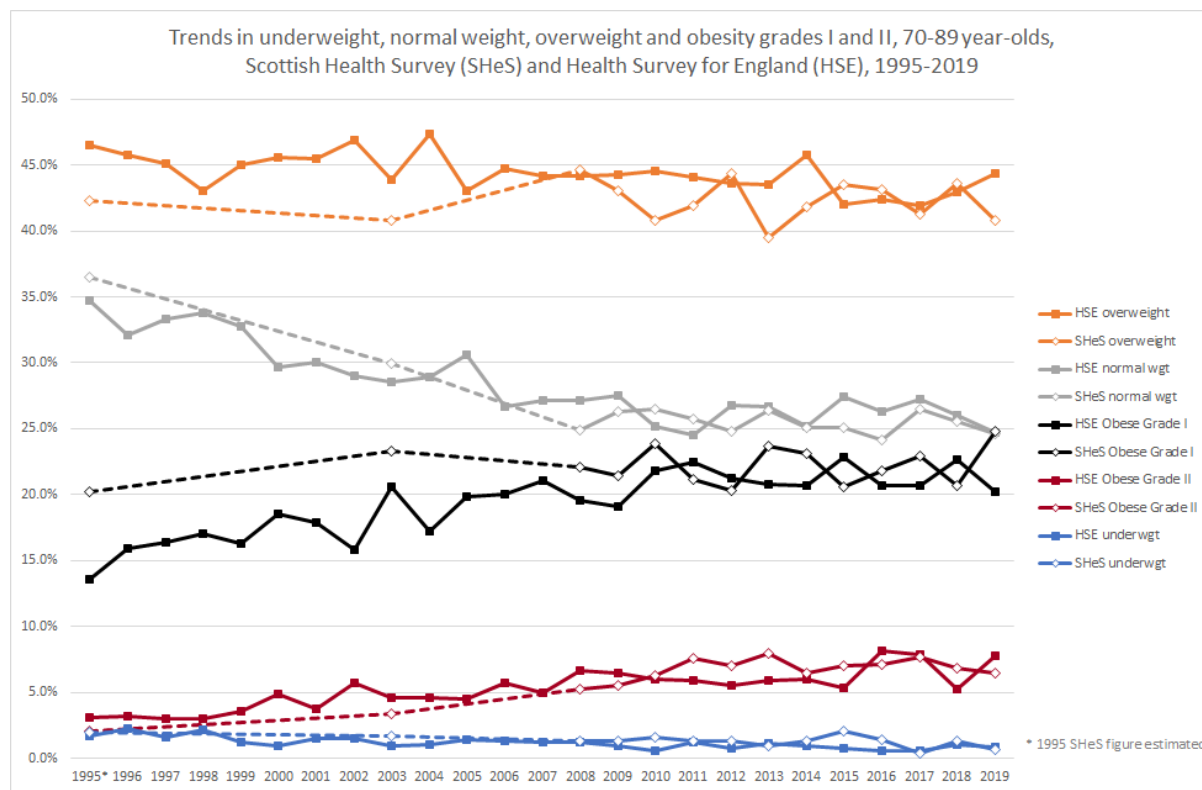

1  
2  
3 References  
4  
5

6 <sup>1</sup> Global BMI Mortality Collaboration. Body-mass index and all-cause mortality: individual-  
7 participant-data meta-analysis of 239 prospective studies in four continents. Lancet 2016;  
8 388(10046): 776-86  
9

10 <sup>2</sup> Bhaskaran K., Dos-Santos-Silva I., Leon D.A., Douglas I.J., Smeeth L. Association of BMI with overall  
11 and cause-specific mortality: a population-based cohort study of 3.6 million adults in the UK. Lancet  
12 Diabetes Endocrinol. 2018; 6(12): 944-953  
13  
14  
15  
16  
17  
18  
19  
20  
21  
22  
23  
24  
25  
26  
27  
28  
29  
30  
31  
32  
33  
34  
35  
36  
37  
38  
39  
40  
41  
42  
43  
44  
45  
46  
47  
48  
49  
50  
51  
52  
53  
54  
55  
56  
57  
58  
59  
60

For peer review only

## STROBE Statement—checklist of items that should be included in reports of observational studies

|                           | Item No | Recommendation                                                                                                                                                                                                                                                                                                                                                                                                                                                         | Page No |
|---------------------------|---------|------------------------------------------------------------------------------------------------------------------------------------------------------------------------------------------------------------------------------------------------------------------------------------------------------------------------------------------------------------------------------------------------------------------------------------------------------------------------|---------|
| <b>Title and abstract</b> | 1       | (a) Indicate the study's design with a commonly used term in the title or the abstract                                                                                                                                                                                                                                                                                                                                                                                 | 1       |
|                           |         | (b) Provide in the abstract an informative and balanced summary of what was done and what was found                                                                                                                                                                                                                                                                                                                                                                    | 2-3     |
| <b>Introduction</b>       |         |                                                                                                                                                                                                                                                                                                                                                                                                                                                                        |         |
| Background/rationale      | 2       | Explain the scientific background and rationale for the investigation being reported                                                                                                                                                                                                                                                                                                                                                                                   | 4       |
| Objectives                | 3       | State specific objectives, including any prespecified hypotheses                                                                                                                                                                                                                                                                                                                                                                                                       | 4       |
| <b>Methods</b>            |         |                                                                                                                                                                                                                                                                                                                                                                                                                                                                        |         |
| Study design              | 4       | Present key elements of study design early in the paper                                                                                                                                                                                                                                                                                                                                                                                                                | 5-7     |
| Setting                   | 5       | Describe the setting, locations, and relevant dates, including periods of recruitment, exposure, follow-up, and data collection                                                                                                                                                                                                                                                                                                                                        | 5-6     |
| Participants              | 6       | (a) <i>Cohort study</i> —Give the eligibility criteria, and the sources and methods of selection of participants. Describe methods of follow-up<br><i>Case-control study</i> —Give the eligibility criteria, and the sources and methods of case ascertainment and control selection. Give the rationale for the choice of cases and controls<br><i>Cross-sectional study</i> —Give the eligibility criteria, and the sources and methods of selection of participants | 5-7     |
|                           |         | (b) <i>Cohort study</i> —For matched studies, give matching criteria and number of exposed and unexposed<br><i>Case-control study</i> —For matched studies, give matching criteria and the number of controls per case                                                                                                                                                                                                                                                 |         |
| Variables                 | 7       | Clearly define all outcomes, exposures, predictors, potential confounders, and effect modifiers. Give diagnostic criteria, if applicable                                                                                                                                                                                                                                                                                                                               | 5-7     |
| Data sources/measurement  | 8*      | For each variable of interest, give sources of data and details of methods of assessment (measurement). Describe comparability of assessment methods if there is more than one group                                                                                                                                                                                                                                                                                   | 5-7     |
| Bias                      | 9       | Describe any efforts to address potential sources of bias                                                                                                                                                                                                                                                                                                                                                                                                              | 7       |
| Study size                | 10      | Explain how the study size was arrived at                                                                                                                                                                                                                                                                                                                                                                                                                              | 5       |
| Quantitative variables    | 11      | Explain how quantitative variables were handled in the analyses. If applicable, describe which groupings were chosen and why                                                                                                                                                                                                                                                                                                                                           | 5-6     |
| Statistical methods       | 12      | (a) Describe all statistical methods, including those used to control for confounding                                                                                                                                                                                                                                                                                                                                                                                  | 5-7     |
|                           |         | (b) Describe any methods used to examine subgroups and interactions                                                                                                                                                                                                                                                                                                                                                                                                    | 5-7     |
|                           |         | (c) Explain how missing data were addressed                                                                                                                                                                                                                                                                                                                                                                                                                            | n/a     |
|                           |         | (d) <i>Cohort study</i> —If applicable, explain how loss to follow-up was addressed<br><i>Case-control study</i> —If applicable, explain how matching of cases and controls was addressed<br><i>Cross-sectional study</i> —If applicable, describe analytical methods taking account of sampling strategy                                                                                                                                                              | n/a     |
|                           |         | (e) Describe any sensitivity analyses                                                                                                                                                                                                                                                                                                                                                                                                                                  | 7       |

Continued on next page



1  
2  
3  
4  
5  
6  
7  
8  
9  
10  
11  
12  
13  
14  
15  
16  
17  
18  
19  
20  
21  
22  
23  
24  
25  
26  
27  
28  
29  
30  
31  
32  
33  
34  
35  
36  
37  
38  
39  
40  
41  
42  
43  
44  
45  
46  
47  
48  
49  
50  
51  
52  
53  
54  
55  
56  
57  
58  
59  
60**Results**

|                  |     |                                                                                                                                                                                                                                                                                                 |                                |
|------------------|-----|-------------------------------------------------------------------------------------------------------------------------------------------------------------------------------------------------------------------------------------------------------------------------------------------------|--------------------------------|
| Participants     | 13* | (a) Report numbers of individuals at each stage of study—eg numbers potentially eligible, examined for eligibility, confirmed eligible, included in the study, completing follow-up, and analysed<br>(b) Give reasons for non-participation at each stage<br>(c) Consider use of a flow diagram | 6 (and Supplementary Table S2) |
| Descriptive data | 14* | (a) Give characteristics of study participants (eg demographic, clinical, social) and information on exposures and potential confounders                                                                                                                                                        | 7                              |
|                  |     | (b) Indicate number of participants with missing data for each variable of interest                                                                                                                                                                                                             | n/a (total population)         |
|                  |     | (c) <i>Cohort study</i> —Summarise follow-up time (eg, average and total amount)                                                                                                                                                                                                                |                                |
| Outcome data     | 15* | <i>Cohort study</i> —Report numbers of outcome events or summary measures over time                                                                                                                                                                                                             |                                |
|                  |     | <i>Case-control study</i> —Report numbers in each exposure category, or summary measures of exposure                                                                                                                                                                                            |                                |
|                  |     | <i>Cross-sectional study</i> —Report numbers of outcome events or summary measures                                                                                                                                                                                                              | 7-9                            |
| Main results     | 16  | (a) Give unadjusted estimates and, if applicable, confounder-adjusted estimates and their precision (eg, 95% confidence interval). Make clear which confounders were adjusted for and why they were included                                                                                    | 7-10                           |
|                  |     | (b) Report category boundaries when continuous variables were categorized                                                                                                                                                                                                                       | n/a                            |
|                  |     | (c) If relevant, consider translating estimates of relative risk into absolute risk for a meaningful time period                                                                                                                                                                                | n/a                            |
| Other analyses   | 17  | Report other analyses done—eg analyses of subgroups and interactions, and sensitivity analyses                                                                                                                                                                                                  | 9                              |

**Discussion**

|                  |    |                                                                                                                                                                            |       |
|------------------|----|----------------------------------------------------------------------------------------------------------------------------------------------------------------------------|-------|
| Key results      | 18 | Summarise key results with reference to study objectives                                                                                                                   | 10    |
| Limitations      | 19 | Discuss limitations of the study, taking into account sources of potential bias or imprecision. Discuss both direction and magnitude of any potential bias                 | 11    |
| Interpretation   | 20 | Give a cautious overall interpretation of results considering objectives, limitations, multiplicity of analyses, results from similar studies, and other relevant evidence | 10    |
| Generalisability | 21 | Discuss the generalisability (external validity) of the study results                                                                                                      | 12-13 |

**Other information**

|         |    |                                                                                                                                                               |    |
|---------|----|---------------------------------------------------------------------------------------------------------------------------------------------------------------|----|
| Funding | 22 | Give the source of funding and the role of the funders for the present study and, if applicable, for the original study on which the present article is based | 15 |
|---------|----|---------------------------------------------------------------------------------------------------------------------------------------------------------------|----|

\*Give information separately for cases and controls in case-control studies and, if applicable, for exposed and unexposed groups in cohort and cross-sectional studies.

**Note:** An Explanation and Elaboration article discusses each checklist item and gives methodological background and published examples of transparent reporting. The STROBE checklist is best used in conjunction with this article (freely available on the Web sites of PLoS Medicine at <http://www.plosmedicine.org/>, Annals of Internal Medicine at

1  
2 <http://www.annals.org/>, and *Epidemiology* at <http://www.epidem.com/>). Information on the STROBE Initiative is  
3 available at [www.strobe-statement.org](http://www.strobe-statement.org).  
4  
5  
6  
7  
8  
9  
10  
11  
12  
13  
14  
15  
16  
17  
18  
19  
20  
21  
22  
23  
24  
25  
26  
27  
28  
29  
30  
31  
32  
33  
34  
35  
36  
37  
38  
39  
40  
41  
42  
43  
44  
45  
46  
47  
48  
49  
50  
51  
52  
53  
54  
55  
56  
57  
58  
59  
60

For peer review only

# BMJ Open

## How much of the stalled mortality trends in Scotland and England can be attributed to obesity?

|                                 |                                                                                                                                                                                                                                                                                 |
|---------------------------------|---------------------------------------------------------------------------------------------------------------------------------------------------------------------------------------------------------------------------------------------------------------------------------|
| Journal:                        | <i>BMJ Open</i>                                                                                                                                                                                                                                                                 |
| Manuscript ID                   | bmjopen-2022-067310.R1                                                                                                                                                                                                                                                          |
| Article Type:                   | Original research                                                                                                                                                                                                                                                               |
| Date Submitted by the Author:   | 17-Nov-2022                                                                                                                                                                                                                                                                     |
| Complete List of Authors:       | Walsh, David; Glasgow Centre for Population Health<br>Tod, Elaine; Public Health Scotland Glasgow Office<br>McCartney, Gerry; University of Glasgow; Public Health Scotland<br>Glasgow Office, Clinical and Protecting Health<br>Levin, Kate Ann; NHS Greater Glasgow and Clyde |
| <b>Primary Subject Heading</b>: | Epidemiology                                                                                                                                                                                                                                                                    |
| Secondary Subject Heading:      | Public health                                                                                                                                                                                                                                                                   |
| Keywords:                       | PUBLIC HEALTH, SOCIAL MEDICINE, EPIDEMIOLOGY                                                                                                                                                                                                                                    |
|                                 |                                                                                                                                                                                                                                                                                 |

SCHOLARONE™  
Manuscripts



I, the Submitting Author has the right to grant and does grant on behalf of all authors of the Work (as defined in the below author licence), an exclusive licence and/or a non-exclusive licence for contributions from authors who are: i) UK Crown employees; ii) where BMJ has agreed a CC-BY licence shall apply, and/or iii) in accordance with the terms applicable for US Federal Government officers or employees acting as part of their official duties; on a worldwide, perpetual, irrevocable, royalty-free basis to BMJ Publishing Group Ltd ("BMJ") its licensees and where the relevant Journal is co-owned by BMJ to the co-owners of the Journal, to publish the Work in this journal and any other BMJ products and to exploit all rights, as set out in our [licence](#).

The Submitting Author accepts and understands that any supply made under these terms is made by BMJ to the Submitting Author unless you are acting as an employee on behalf of your employer or a postgraduate student of an affiliated institution which is paying any applicable article publishing charge ("APC") for Open Access articles. Where the Submitting Author wishes to make the Work available on an Open Access basis (and intends to pay the relevant APC), the terms of reuse of such Open Access shall be governed by a Creative Commons licence – details of these licences and which [Creative Commons](#) licence will apply to this Work are set out in our licence referred to above.

Other than as permitted in any relevant BMJ Author's Self Archiving Policies, I confirm this Work has not been accepted for publication elsewhere, is not being considered for publication elsewhere and does not duplicate material already published. I confirm all authors consent to publication of this Work and authorise the granting of this licence.

1  
2  
3 **How much of the stalled mortality trends in Scotland and England can be attributed to**  
4  
5 **obesity?**  
6  
7

8 **David Walsh<sup>1</sup>, Elaine Tod<sup>2</sup>, Gerry McCartney<sup>3</sup>, Kate A. Levin<sup>4</sup>**  
9

- 10  
11 1. Public Health Programme Manager, Glasgow Centre for Population Health, Olympia  
12 Building, 2-16 Orr Street, Bridgeton Cross, Glasgow G40 2QH, Scotland. Tel: 0141 330  
13 2793  
14  
15  
16  
17  
18 2. Public Health Intelligence Adviser, Public Health Scotland, Glasgow, Scotland  
19  
20  
21 3. Professor of Wellbeing Economy, College of Social Sciences, University of Glasgow,  
22 Glasgow, Scotland.  
23  
24  
25  
26  
27 4. Senior Researcher, NHS Greater Glasgow and Clyde, Glasgow Scotland  
28  
29

30 Correspondence to: [david.walsh.2@glasgow.ac.uk](mailto:david.walsh.2@glasgow.ac.uk)  
31

32  
33 **Keywords:** obesity, mortality, 'population attributable fractions', austerity, Scotland,  
34  
35  
36  
37  
38  
39  
40  
41  
42  
43  
44  
45  
46  
47  
48  
49  
50  
51  
52  
53  
54  
55  
56  
57  
58  
59  
60  
England

## Abstract

### Objectives

The rate of improvement in all-cause mortality rates has slowed in the UK since around 2012. While evidence suggests that UK Government 'austerity' policies have been largely responsible, it has been proposed that rising obesity may also have contributed. The aim here was to estimate this contribution for Scotland and England.

### Methods

We calculated population attributable fractions (PAFs) resulting from changes in Body Mass Index (BMI) between the mid-1990s and late 2000s for all-cause mortality among 35-89 year-olds in 2017-19. We used BMI data from national surveys (the Scottish Health Survey and the Health Survey for England), and hazard ratios (HRs) from a meta-analysis of 89 European studies. PAFs were applied to mortality data for 2017-19 (obtained from national registries), enabling comparison of observed rates, BMI-adjusted rates and projected rates. Uncertainty in the estimates is dominated by the assumptions used and biases in the underlying data, rather than random variation. A series of sensitivity analyses and bias assessments were therefore undertaken to understand the certainty of the estimates.

### Results

In Scotland, an estimated 10% (males) and 14% (females) of the difference between observed and predicted mortality rates in 2017-19 may be attributable to previous changes in BMI. The equivalent figures for England were notably higher: 20% and 35% respectively. The assessments of bias suggest these are more likely to be overestimates than underestimates.

## Conclusions

Some of the recent stalled mortality trends in Scotland and England may be associated with earlier increases in obesity. Policies to reduce the obesogenic environment, including its structural and commercial determinants, and reverse the impacts of austerity, are needed.

(264 words)

## Strengths and limitations of this study

- We calculate population attributable fractions (PAFs) for the change in body mass index (BMI) (including obesity) for the populations of Scotland and England, using measured (not self-assessed) BMI data from nationally representative health surveys.
- We compare observed mortality rates, BMI-adjusted mortality rates, and projected mortality rates in 2016-19 to estimate the proportion of recent changes in mortality that is likely to be attributable to earlier changes in BMI (including increases in obesity).
- Weaknesses include a lack of socioeconomic stratification: as recent changes in mortality rates in Scotland and England have been more profound among socioeconomically deprived populations, this would have been an important addition to the analyses.
- While the use of nationally representative survey data represents a general strength of the methodology, declining response rates also present challenges to interpretation, and introduce potential biases.

## INTRODUCTION

Deeply concerning changes to mortality rates have been observed across the UK since the early 2010s: population average mortality rates have stopped improving, whilst mortality rates among poorer populations have increased [1-5]. Such changes have been seen for many different causes of death, with cardiovascular mortality particularly affected [6,7]. Similar stalled mortality trends have been recorded in other high-income countries.

While the causes of these changes in the UK have been debated, a large body of evidence now suggests that UK Government 'austerity' measures, implemented in 2010 following 'the great recession' of 2008 and which have disproportionately affected the poorest in society, are largely to blame [8-14]. The impact of similar austerity measures in slowing mortality improvement in other countries has also been demonstrated [15-18].

However, it has also been proposed that these trends may have additionally been influenced by changes in levels of adult obesity prevalence: this has been suggested in relation to the UK [19], the US [20-21, Australia [21] and elsewhere [22]. This is largely because of two factors. First, there is a clear association between obesity and both cause-specific (including cardiovascular disease) and all-cause mortality, with the weight of evidence suggesting this relationship is causal [23]. Second, considerable increases in obesity prevalence have been recorded in the UK (and elsewhere) in recent decades [24], and these pre-date the more recent changes to all-cause mortality discussed above. While this hypothesis appears plausible, it has not yet been tested. The aim of this study, therefore, was to assess, and quantify, the extent to which any of the mortality changes observed in Scotland and England since the early 2010s may be attributable to prior increases in obesity levels in the population.



## METHODS

### *Populations and data sources*

We used data for the populations of Scotland and England: the change in mortality rates since 2012 has been similar in both countries, and trend data on adult obesity prevalence are available for both.

Mortality (and matching population denominator) data by age, sex and year were obtained from national registries, the National Records of Scotland (NRS) and the Office for National Statistics (ONS) respectively. Data were for all causes of death combined (rather than specific individual causes) as that was the focus of the study. Data on adult body mass index (BMI) distribution in the populations were accessed from the Scottish Health Survey (SHeS) and the Health Survey for England (HSE) via the UK Data Service [25-27]. Both are long-running (from the early-to-mid 1990s to the present day), nationally-representative, surveys which include measured (rather than self-reported) height and weight (from which BMI is calculated) for large samples of the adult population. In 2008 (the last year of data employed here), adult sample sizes were approximately 6,500 (SHeS) and 15,000 (HSE), with household response rates of 61% and 64% respectively [28,29]. More precise details of the survey years employed in the analyses, and the size of the age-specific sample sizes, are provided below and in the supplementary material.

### *Statistical analyses*

Population attributable fractions (PAFs) were calculated for changes in BMI distribution (including therefore the increase in overweight and obesity) between the mid-1990s and late 2000s in relation to all-cause mortality among 35-89 year-olds. PAFs are defined as the proportion of cases (here, all-cause deaths) attributable to a particular exposure [30]: in this case the latter is defined as the change in BMI distribution over time. The 35-89 year age

group was determined by the availability of age-specific hazard ratios (HRs): we used previously-published HRs from a meta-analysis of 89 European studies of BMI and all-cause mortality undertaken by the Global BMI Mortality Collaboration (GBMC) [23]. To reduce the risk of confounding and reverse causality, the GBMC meta-analysis excluded smokers, those with chronic disease at time of recruitment, and participants who died within the first five years of follow-up. HRs were available for six BMI categories and three age groups (35-49 years, 50-69 years, 70-89 years) (Supplementary Table S1), and were based on c.14 years' follow-up. The PAF calculation was based on comparison of the BMI distribution in 1995 (the earliest time point available for the Scottish data) and 2008: this covers the period of considerable increase in obesity in both Scotland and England (discussed further below), and also broadly fits with both the c.14 year follow-up period on which the HRs calculation was based, and the later period of stalling improvement in mortality in both countries. PAF was therefore calculated as:

$$PAF = \frac{[\sum(p_{2008} \text{ BMI category } i \times HR_i) - \sum(p_{1995} \text{ BMI category } i \times HR_i)]}{\sum(p_{2008} \text{ BMI category } i \times HR_i)}$$

The 1995 SHeS only sampled adults aged 16-64 years; data for 65-89 years were therefore estimated from age-specific distributions in 2003 (the first survey that included all adults aged 16+ years). Sample sizes for the 35-89 age band were approximately 4,000 in SHeS in both years, and c.9,700 (1995) and c.8,750 (2008) in HSE. Full details of sample sizes and methods employed to derive data for the older age groups in 1995 are provided in Supplementary Table S2.

PAFs were applied to observed counts of deaths by five-year age band, sex, year, and country for the period 2016-19 (i.e. the most recent period of the stalling prior to the COVID-19 pandemic): this enabled calculation and comparison of *observed* mortality rates with *BMI-adjusted* rates (i.e. excluding deaths attributable to the change in BMI distribution).

1  
2  
3 These were then further compared with *projected* rates (i.e. the rates that were predicted  
4 had the stalling of improvement not occurred): the latter were calculated for 2011-2019  
5 based on linear trends. Three sets of projections were produced: 1981-based (i.e. based on  
6 the linear trend for 1981-2010), 1991-based and 2001-based. All rates were age-  
7 standardised using the 2013 European Standard Population [31], and stratified by sex and  
8 country.

9  
10  
11  
12  
13  
14  
15  
16  
17 A range of sensitivity analyses were undertaken. These included the use of survey data for  
18 three-year averages instead of single year points (e.g. 1994-96 average instead of 1995), and  
19 employing different HRs for different age groups in the calculation of the PAFs: the latter  
20 HRs were approximated from a large English study of over 3.5 million adults with c.18 years  
21 follow-up, and which employed similar exclusion criteria as the GBMC study (Supplementary  
22 Table S3) [32]. Those PAFs were also applied to different age groups in the mortality  
23 analyses. Analyses of age-specific trends were undertaken to explore differences in the PAFs  
24 between Scotland and England.

25  
26  
27  
28  
29  
30  
31  
32  
33  
34  
35  
36 An assessment of the scale and direction of any likely bias was informed by reviews of  
37 relevant PAF-based literature.

#### 38 39 40 41 *Patient and Public Involvement*

42  
43  
44 Patients and the public were not involved in this study.

## 45 46 47 48 49 **RESULTS**

50  
51  
52 As context to the main results, Figure 1 presents trends in adult obesity prevalence in  
53 Scotland and England between 1995 and 2019. In 1995 the overall prevalence was  
54 approximately 16% in both countries; by 2019 it had increased to 28-29% (with female rates  
55 slightly higher than male rates). However, the biggest increases took place between the mid-  
56  
57  
58  
59  
60

1  
2  
3 1990s and the late 2000s, with much smaller increases seen in the later period: for example,  
4  
5 for males in England, and males and females in Scotland, prevalence increased by only 1-2  
6  
7 percentage points between 2010 and 2019.  
8  
9

10 [Figure 1 about here]  
11

12  
13 The calculated PAFs by age group and country are shown in Supplementary Table S4. The  
14  
15 age-specific values were broadly similar for both countries with the exception of the oldest  
16  
17 age group (70-89 years) where the PAF was small but positive for English data (0.029) and  
18  
19 small but negative (-0.008) for the Scottish data. This is discussed further below.  
20  
21

22  
23 Figures 2 and 3 compare the observed European age-standardised mortality rates (EASRs)  
24  
25 for 35-89 year-olds with the BMI-adjusted EASRs and the 1991-based projected EASRs. Data  
26  
27 are shown separately for males and females in Scotland (Figure 2) and England (Figure 3).  
28

29  
30 The divergence between projected and observed rates is clear in all cases and has widened  
31  
32 over time; it is greater for males than females. In all cases the gap in each year is reduced by  
33  
34 the BMI-adjusted EARS, but to a greater extent in England than in Scotland.  
35

36  
37 [Figures 2 & 3 about here]  
38  
39

40 Table 1 quantifies the differences shown in Figures 2 and 3 above. It presents the three sets  
41  
42 of EASRs (observed, projected, and BMI-adjusted) as well as a comparison of the observed-  
43  
44 projected gap with the BMI-adjusted-projected gap: this can be interpreted as the amount  
45  
46 of the observed-projected gap that can be potentially attributed to the change in BMI  
47  
48 between 1995 and 2008. Data are shown annually for 2016-19, with – for simplicity –  
49  
50 average figures for the most recent three-year period also presented.  
51  
52

53  
54 This shows that for Scottish males, the average observed EASR for 2017-19 was 1751 (95%  
55  
56 CIs 1729 to 1773). This reduced marginally to 1719 (95% CIs 1697 to 1741) after adjustment  
57  
58 for the change in BMI (in effect, excluding the increase in overweight- and obesity-related  
59  
60

1  
2  
3 deaths), but was still notably higher than the projected EASR of 1447 (95% CIs 1427 to 1467).

4  
5 The change in BMI therefore potentially 'explained' 10.5% of the difference between the  
6  
7 observed and projected rates. For females, 13.6% of the difference could be attributed in  
8  
9 this manner. However, the figures for England were notably higher: average figures of 20.1%  
10  
11 for males and 35.1% for females.  
12  
13  
14  
15  
16  
17  
18  
19  
20  
21  
22  
23  
24  
25  
26  
27  
28  
29  
30  
31  
32  
33  
34  
35  
36  
37  
38  
39  
40  
41  
42  
43  
44  
45  
46  
47  
48  
49  
50  
51  
52  
53  
54  
55  
56  
57  
58  
59  
60

For peer review only

1  
2  
3  
4  
5  
6  
7  
8  
9  
10  
11  
12  
13  
14  
15  
16  
17  
18  
19  
20  
21  
22  
23  
24  
25  
26  
27  
28  
29  
30  
31  
32  
33  
34  
35  
36  
37  
38  
39  
40  
41  
42  
43  
44  
45  
46

|                 | Males          |               |                   |                       |                                                                  | Females       |                   |                       |                                                                  |  |
|-----------------|----------------|---------------|-------------------|-----------------------|------------------------------------------------------------------|---------------|-------------------|-----------------------|------------------------------------------------------------------|--|
|                 | Year           | Observed rate | BMI-adjusted rate | Projected rate (1991) | % of observed-projected difference attributable to change in BMI | Observed rate | BMI-adjusted rate | Projected rate (1991) | % of observed-projected difference attributable to change in BMI |  |
| <b>Scotland</b> | 2016           | 1777.7        | 1744.9            | 1565.6                | 15.5%                                                            | 1276.2        | 1257.0            | 1180.3                | 20.0%                                                            |  |
|                 | 2017           | 1775.7        | 1744.4            | 1506.3                | 11.6%                                                            | 1282.8        | 1263.7            | 1151.6                | 14.5%                                                            |  |
|                 | 2018           | 1762.1        | 1729.9            | 1447.1                | 10.2%                                                            | 1277.0        | 1257.3            | 1122.8                | 12.8%                                                            |  |
|                 | 2019           | 1716.3        | 1684.0            | 1387.8                | 9.8%                                                             | 1245.1        | 1224.9            | 1094.1                | 13.4%                                                            |  |
|                 |                |               |                   |                       |                                                                  |               |                   |                       |                                                                  |  |
|                 | <i>2017-19</i> | <i>1750.7</i> | <i>1718.8</i>     | <i>1447.1</i>         | <i>10.5%</i>                                                     | <i>1268.0</i> | <i>1248.3</i>     | <i>1122.8</i>         | <i>13.6%</i>                                                     |  |
| <b>England</b>  | 2016           | 1472.1        | 1411.2            | 1252.0                | 27.7%                                                            | 1042.1        | 1000.1            | 951.1                 | 46.2%                                                            |  |
|                 | 2017           | 1459.7        | 1399.2            | 1196.3                | 23.0%                                                            | 1029.2        | 987.8             | 923.6                 | 39.2%                                                            |  |
|                 | 2018           | 1453.1        | 1392.6            | 1140.6                | 19.4%                                                            | 1026.7        | 985.2             | 896.2                 | 31.8%                                                            |  |
|                 | 2019           | 1404.2        | 1345.7            | 1084.9                | 18.3%                                                            | 985.5         | 945.5             | 868.8                 | 34.2%                                                            |  |
|                 |                |               |                   |                       |                                                                  |               |                   |                       |                                                                  |  |
|                 | <i>2017-19</i> | <i>1438.5</i> | <i>1378.6</i>     | <i>1140.6</i>         | <i>20.1%</i>                                                     | <i>1013.5</i> | <i>972.6</i>      | <i>896.2</i>          | <i>34.9%</i>                                                     |  |

Table 1. Comparison of observed, projected and BMI-adjusted age-standardised mortality rates per 100,000 population among 35-89 year-olds, Scotland and England, 2016-19.

1  
2  
3 The gap between the observed and projected EASRs is smaller when using 1981-based  
4 projections, and greater when using 2001-based projections. These are shown in  
5  
6 Supplementary Figures S1 and S2, and quantified further in Supplementary Table S5.  
7  
8  
9

10 The use of the different HRs and different age groups in sensitivity analyses resulted in lower  
11 PAFs (Supplementary Table S6). Consequently, less of the difference between observed and  
12  
13 projected mortality rates could be attributed to changes in BMI than was the case in the  
14  
15 main analyses. For example, the 20.1% figure for males in England shown in Table 1 was  
16  
17 reduced to 16.4% when applied to the same 35-89 age band in the mortality analyses, to  
18  
19 15.1% when applied to 15-84 years, and to 13.2% when applied to 15+ years. Similar  
20  
21 reductions of between approximately a third and a fifth were shown for females in England  
22  
23 (Supplementary Table S7).  
24  
25  
26  
27  
28

29 Additional analyses to explore the difference in the PAFs for the oldest age group in Scotland  
30 (negative) and England (positive) suggested that it was partly explained by a smaller increase  
31  
32 in Grade I obesity in Scotland. In England, the prevalence in this age group increased by 44%  
33  
34 from 13.6% to 19.6% between 1995 and 2008; in Scotland, the prevalence was already  
35  
36 higher in 1995 (20.2%) and only increased marginally to 22.0% in 2008. A greater increase in  
37  
38 Scotland would have resulted in a positive, rather than negative, PAF (data not shown).  
39  
40 Given that the 70-89 years age group was not sampled in the 1995 SHeS, with estimates  
41  
42 instead derived from proportions in the 2003 survey, the accuracy of these figures is  
43  
44 uncertain. However, analyses of long-term trends for this age group showed that trends  
45  
46 have fluctuated between approximately 20% and 24% in most years, and in that context the  
47  
48 derived estimate for 1995 seems plausible (Supplementary Figure S3). Furthermore,  
49  
50 comparison with English trends support the observation of higher Grade I obesity in this age  
51  
52 group: despite considerable fluctuation in rates over time, levels were higher in Scotland in 9  
53  
54 of the 13 available data points between 2003 and 2019 (Supplementary Figure S4).  
55  
56  
57  
58  
59  
60

1  
2  
3 Despite such fluctuations in rates, only marginal differences in results were observed when  
4  
5 using three-year averages rather than single years in the calculation of PAFs across all age  
6  
7 groups (Supplementary Tables S8-S10).  
8  
9

10 The assessment of potential biases is shown in Table 2. Of the ten sources of potential bias  
11  
12 listed, five suggest potential overestimation of effect size, two suggest underestimation, and  
13  
14 the remaining three are unclear. In the majority of cases the size of any bias is either small or  
15  
16 unclear. The implication is that the estimates produced are more likely to be overestimates  
17  
18 of the contribution of obesity rather than underestimation, but this is uncertain.  
19  
20  
21  
22  
23  
24  
25  
26  
27  
28  
29  
30  
31  
32  
33  
34  
35  
36  
37  
38  
39  
40  
41  
42  
43  
44  
45  
46  
47  
48  
49  
50  
51  
52  
53  
54  
55  
56  
57  
58  
59  
60



|   | Source of potential bias                                | Direction                         | Magnitude | Notes                                                                                                                                                                                                                                                                                                                                                                                                                                                                                                                                                                                                                                                                                                                                                                                                                                                                                                                                |
|---|---------------------------------------------------------|-----------------------------------|-----------|--------------------------------------------------------------------------------------------------------------------------------------------------------------------------------------------------------------------------------------------------------------------------------------------------------------------------------------------------------------------------------------------------------------------------------------------------------------------------------------------------------------------------------------------------------------------------------------------------------------------------------------------------------------------------------------------------------------------------------------------------------------------------------------------------------------------------------------------------------------------------------------------------------------------------------------|
| 1 | BMI treated as categorical rather than continuous data  | Unclear                           | Small     | The 'proportional shift' method (the use of categorical rather than continuous data in the calculation of attributable fractions) has been shown to be associated with the potential for both underestimation and overestimation of effect size. However, the greater the number of categories, the lower the risk of such uncertainty [33]: we employ a relatively large number (six) of BMI categories.                                                                                                                                                                                                                                                                                                                                                                                                                                                                                                                            |
| 2 | Declining survey response rates                         | Underestimation of obesity effect | Unclear   | Both surveys are large and deemed nationally representative, and both are weighted to adjust for non-response: however, in the case of the English survey, this weighting was only introduced in 2003, and therefore was not applied to the 1995 data; furthermore, despite the use of such weights, the data may still be potentially affected by a 'healthy respondent' bias [34]. The latter, however, is difficult to quantify.                                                                                                                                                                                                                                                                                                                                                                                                                                                                                                  |
| 3 | Broad age bands with potential for residual confounding | Overestimation of obesity effect  | Unclear   | Some of the change in BMI between the two time periods will be due to ageing, and this may not be captured because of the large age bands employed.                                                                                                                                                                                                                                                                                                                                                                                                                                                                                                                                                                                                                                                                                                                                                                                  |
| 4 | Exclusion of those aged 16-34 and 90+ years             | Underestimation of obesity effect | Small     | The exclusion of these sections of the adult population would suggest potential underestimation of effect size, especially given that overweight and obesity levels increased among both age groups between 1995 and 2008 [35]. However, the level of underestimation is likely to be small, given the relatively small number of deaths that occur in the younger age group overall, and the likely number of deaths <i>from relevant causes</i> for those aged 90 and above. Furthermore, sensitivity analyses using hazard ratios (HRs) approximated from the Bhaskaran et al study [32] which covered both age groups (the age bands used were 16-49, 50-69, 70-79 and 80+ years) suggested <i>fewer</i> deaths were attributable to the change in BMI than was the case using the HRs for 35-89 year-olds only. The calculated PAF for the 80+ years group was also very small in those analyses (e.g. 0.004 for English data). |
| 5 | Hazard ratios not generalisable to Scotland and England | Overestimation of obesity effect  | Small     | The HRs used in the analyses (from the work published by the Global BMI Mortality Collaboration (GBMC)) were calculated from a meta-analysis of 89 European studies, a considerable number of which were from the UK [23]. Assuming no effect modification from country/study-specific context, the HRs should be appropriate for use in our analyses of UK data, despite the higher levels of overweight and obesity observed in the UK.                                                                                                                                                                                                                                                                                                                                                                                                                                                                                            |

|    | Source of potential bias                                           | Direction                        | Magnitude  | Notes                                                                                                                                                                                                                                                                                                                                                                                                                                                                                                                                    |
|----|--------------------------------------------------------------------|----------------------------------|------------|------------------------------------------------------------------------------------------------------------------------------------------------------------------------------------------------------------------------------------------------------------------------------------------------------------------------------------------------------------------------------------------------------------------------------------------------------------------------------------------------------------------------------------------|
|    |                                                                    |                                  |            | However, sensitivity analyses using alternative HRs approximated from the study by Bhaskaran et al [32], which were calculated from data for over 3.5 million adults in England (and based on c.18 year follow-up), resulted in smaller PAFs and therefore fewer deaths attributable to BMI changes over time in England, suggesting the use of the GBMC HRs may have slightly overestimated the effect size.                                                                                                                            |
| 6  | Hazard ratios prone to confounding                                 | Overestimation of obesity effect | Unclear    | HRs from the GBMC study are not adjusted for socioeconomic deprivation, levels of physical activity or diet, and thus represent a likely overestimation of effect size, albeit one that is difficult to quantify.                                                                                                                                                                                                                                                                                                                        |
| 7  | Changes in BMI due to pre-existing ill-health                      | Overestimation of obesity effect | Negligible | By excluding smokers and ex-smokers, those with chronic disease at time of recruitment, and participants who died within the first five years of follow-up, the GBMC study (the HRs from which are used here) largely removed this risk.                                                                                                                                                                                                                                                                                                 |
| 8  | Interpolated data for age 65-89 years in 1995 Scottish survey data | Unclear                          | Unclear    | Analyses comparing the estimated figure for 1995 with observed trend data in other years of the survey do not suggest any obvious inaccuracies, and there are no other data from other Scottish surveys that can be compared. However, the PAF for the 70-89 years age group is negative in the Scottish data (-0.008) but positive in the English data (0.028) which contrasts with the other two age groups where the PAFs are very similar in the two data sets. The extent to which this may relate to the interpolation is unknown. |
| 9  | Use of single-year comparison time points in calculation of PAFs   | Unclear                          | Small      | Sensitivity analyses using three year averages (1994-96 instead of 1995, and 2007-09 instead of 2008) suggest a minimal impact.                                                                                                                                                                                                                                                                                                                                                                                                          |
| 10 | Lengthy follow-up period                                           | Overestimation of obesity effect | Unclear    | The potential for overestimation of effect size has been highlighted for studies with long follow-up periods on the basis that important 'mediators' (e.g. systolic blood pressure, cholesterol) may decrease over time among those with initially recorded high BMI [36, 37]. It is unclear whether – or to what extent – this may apply here.                                                                                                                                                                                          |

Table 2. Assessment of potential biases in calculation of Population Attributable Fractions (PAFs).

## DISCUSSION

### *Overall findings and implications*

Our analyses suggest that changes in the BMI distribution in Scotland and England between the mid-1990s and late 2000s may have potentially contributed to the mortality changes observed in both countries since around 2012. In Scotland, an estimated 10% (males) and 14% (females) of the difference between observed and predicted mortality rates among 35-89 year-olds in 2017-19 may be attributable to previous changes in BMI. The equivalent figures for England were notably higher: 20% and 35% respectively. However, there is uncertainty around the accuracy of these estimates: sensitivity analyses and bias assessment suggest the potential for overestimation of effect size, although the degree is difficult to quantify.

Alongside the evidence of the role of UK Government austerity measures in the stalling of mortality improvement in Scotland and England [8-14, 17, 18], this suggests the need for a range of government policies to both reverse the damaging effects of austerity, as well as to address the negative consequences of an increased obesogenic environment in the UK [38].

### *Strengths and weaknesses*

A number of limitations of the study are acknowledged. In relation to the survey data sources, these include: the need to derive estimates for older age bands in the 1995 SHeS (although trend analyses suggest the data are plausible); the lack of non-response weighting in the 1995 HSE, as well as the general decline over time in response rates in all such population surveys; and limited time series data (especially in the Scottish survey). Other limitations include the use of the proportional shift method in calculating the PAFS (although data constraints meant no other method was available), the use of age-specific (rather than age *and* sex specific) HRs (age/sex-specific HRs were not available), and the lack of any

1  
2  
3 socioeconomic stratification of the analysis: the latter would have been important given that  
4 the mortality changes observed in the UK in the past decade have particularly affected more  
5 deprived populations [2, 3-5]. Such stratification was not possible for numerous reasons  
6 including: a lack of available hazard ratios for different socioeconomic groups; lack of  
7 population denominator data for individual socioeconomic position (SEP) categories  
8 included in the surveys; the different area deprivation indices in use in Scotland and  
9 England, which would have made comparative interpretation of results problematic; and the  
10 likely small sample sizes (especially in the Scottish survey data) which would also have  
11 increased levels of analytical uncertainty. We did not calculate 95% confidence intervals for  
12 the PAFs on the basis that this would have misrepresented the key sources of uncertainty in  
13 the analyses, which were due to a range of potential biases rather than random variation. It  
14 was also difficult to find a means of combining assessment of random variation in each of  
15 the underlying data sources (BMI distribution, mortality, projected mortality, HRs), as well as  
16 the PAF estimate, that would have adequately represented the random variation. Other  
17 weaknesses are also included within Table 2. However, the study also has a number of  
18 strengths. Despite their acknowledged limitations, both the SHeS and HSE are important  
19 data sources: they are large, nationally representative, surveys which have collected  
20 important measured (not self-reported) anthropometric data since the 1990s. The other  
21 data sources employed in the analyses were also strengths of the study: detailed mortality  
22 data for both countries' whole populations, and HRs from a comprehensive meta-analysis of  
23 a large number of European studies of BMI (and the design of which minimised the risk of  
24 confounding). We also undertook a range of sensitivity analyses and a detailed assessment  
25 of potential biases.

#### 26 27 28 29 30 31 32 33 34 35 36 37 38 39 40 41 42 43 44 45 46 47 48 49 50 51 52 53 54 55 *Relevance to other studies* 56 57 58 59 60

1  
2  
3 The relationship between obesity and all-cause mortality has been demonstrated in  
4 numerous studies [23]. While the weight of evidence suggests that the association is causal,  
5 there has been considerable debate about both the extent of causality, and the measures  
6 such as PAFs that are used to assess it [36, 39-43]. For example, limitations of PAFs (and  
7 obesity-related PAFs in particular) highlighted by Levine [39] include: the flawed nature of  
8 'simple causal partitioning'; the overlapping nature of exposures in a population meaning  
9 that different PAFs add up to more than 100% (thus, assessing single exposures in isolation is  
10 problematic); the importance of the definition of the exposure, such that a more broadly  
11 defined exposure will always increase the size of the PAF (meaning that a high PAF is 'not  
12 necessarily indicative of a better scientific understanding of the causes(s) of disease in the  
13 population than a low PAF'). Flegal and colleagues have echoed many of these sentiments,  
14 also cautioning against interpretations of causality: 'PAFs for obesity may be best considered  
15 as indicators of association' [36]. They supported this argument on the basis of a number of  
16 definitional and methodological issues, including: the importance of how the counterfactual  
17 is defined (with the size of the PAF varying depending on what definition is employed);  
18 potential overestimation in long follow-up studies (as alluded to in Table 2); and important  
19 differences between studies in how obesity-related PAFs are calculated which make  
20 interpretation and comparison of results difficult.

21  
22  
23 Some of these criticisms of PAFs, particularly that relating to the sensitivity of the definition  
24 of the counterfactual, are potentially relevant to some of the results of our study. The  
25 differences between Scotland and England relate in large part to different PAF values for the  
26 oldest age group (70-89 years): although the values of the PAFs for this group are very small,  
27 their impact is significant because of the higher numbers of deaths that are observed. As  
28 described in the results section, the differences in PAF values between countries for this age  
29 group (small but negative for Scotland, small but positive in England) are in part explained by  
30 a smaller increase in levels of Grade I obesity in the Scottish data between the two time  
31  
32  
33  
34  
35  
36  
37  
38  
39  
40  
41  
42  
43  
44  
45  
46  
47  
48  
49  
50  
51  
52  
53  
54  
55  
56  
57  
58  
59  
60

1  
2  
3 periods; a larger increase would have resulted in a positive PAF value. With the value of the  
4  
5 counterfactual here being derived from survey data with smaller, age-specific, sample sizes  
6  
7 and annually fluctuating rates, this therefore both emphasises the need for caution in  
8  
9 interpreting the precise values of the results, and also supports some of the criticisms of  
10  
11 PAFs that have been made by Flegal and others.  
12  
13

14  
15 Despite these criticisms and pleas for cautious interpretation of PAFs in terms of assessing  
16  
17 causality, obesity-related PAFs have been calculated in many studies. This includes recent  
18  
19 work by Ho and colleagues who calculated and compared obesity and smoking related PAFs  
20  
21 from both data sources employed here: SHeS and HSE [44]. The work suggested that deaths  
22  
23 attributable to obesity increased from 18% to 23% between 2003 and 2017, overtaking the  
24  
25 number of deaths attributable to smoking in the process. Other studies have demonstrated  
26  
27 how different methodological approaches can result in different values of obesity related  
28  
29 PAFs. For example, in the Netherlands Vidra et al generated PAFs ranging from 0.9% to 1.8%  
30  
31 (two-fold variation) for the same population, but based on different formulae [43]. They also  
32  
33 showed that the use of European, rather than global, HRs resulted in a higher PAF – this is  
34  
35 relevant to our own study.  
36  
37  
38  
39

40  
41 Vidra et al's estimates for the Netherlands are clearly much lower than Ho et al's for  
42  
43 Scotland and England. Similarly, a comparative study of older (age 60+ years) English and  
44  
45 Brazilian cohorts generated notably higher PAFs for the former compared to the latter: a PAF  
46  
47 of 5.6% for the English cohort (broadly comparable to the PAF for those aged 50-89 years in  
48  
49 the HSE in our study (albeit defined quite differently)) compared to 0.9% for the Brazilian  
50  
51 [45]. Finally, Stringhini et al calculated and compared PAFs for a range of risk factors  
52  
53 (including obesity) from multiple cohorts across the globe [46]. There was a considerable  
54  
55 difference between the male (-5.6%) and female (3.5%) obesity-related PAFs, highlighting a  
56  
57 limitation of our own study in not using sex-specific HRs and PAFs.  
58  
59  
60

### Conclusions

Changes to BMI (including, in particular, increases in obesity) between the mid-1990s and late 2000s are likely to have made a contribution to the stalled trends in mortality observed from around 2012 in both Scotland and England. However, a number of uncertainties are associated with the available data and cautious interpretation of our results is therefore required. The results are likely to be overestimates: thus the majority of the stalled trends is explained by other factors, most likely austerity policies. Action is therefore urgently needed to address both issues: to protect the income (and therefore the health) of the poorest and most vulnerable in society, and to counter the negative consequences, and the structural and commercial determinants, of the obesogenic environment in the UK.

(3,403 words (excluding tables))

### FIGURE CAPTIONS

Figure 1. Trends in the percentage of adults (aged 16+ years) classed as obese (BMI 30+), Scotland (from the Scottish Health Survey (SHeS)) and England (from the Health Survey for England), 1995-2019.

Figure 2. Observed, predicted and BMI-adjusted European age-standardised mortality rates (EASRs), Scotland 1991-2019. Note different y-axis scales for males and females.

Figure 3. Observed, predicted and BMI-adjusted European age-standardised mortality rates (EASRs), England 1991-2019. Note different y-axis scales for males and females.

## ACKNOWLEDGEMENTS

We are grateful to the organisations who supplied the required data: National Records of Scotland (NRS); the Office for National Statistics (ONS); and the UK Data Service (for access to the Scottish Health Survey and Health Survey for England data). Particular thanks also to Prof. Krishnan Bhaskeran at the London School of Hygiene and Tropical Medicine for assistance in accessing the data for some of the sensitivity analyses.

## DECLARATIONS

**Funding:** No specific funding was obtained for this work. GM has recently received funding from the WHO.

**Contributions:** The study was conceived jointly between GM, ET, DW and KAL. The research questions and analysis plan were agreed by all authors. DW undertook all analyses and drafted the manuscript. All authors provided substantial critical input to improve the manuscript and all authors approved the final draft.

**Competing interests:** None declared

**Ethical approval:** None required (we use secondary data sets: mortality and population counts, and published national survey data).

**Data availability:** Data may be obtained from a third party and are not publicly available.



**REFERENCES**

1. Hiam L., Harrison D., McKee M., Dorling D. Why is life expectancy in England and Wales 'stalling'? *Journal of Epidemiology & Community Health* 2018; 72: 404-408.
2. Fenton L., Wyper G.M., McCartney G., Minton, J. Socioeconomic inequality in recent adverse all-cause mortality trends in Scotland *Journal of Epidemiology & Community Health* 2019; 73: 971-974
3. Walsh D., McCartney G., Minton J., Parkinson J., Shipton D., Whyte B. Changing mortality trends in countries and cities of the UK: a population-based trend analysis. *BMJ Open* 2020; 10: e038135
4. Currie J, Boyce T, Evans L, Luker M et al. Life expectancy inequalities in Wales before COVID-19: an exploration of current contributions by age and cause of death and changes between 2002 and 2018. *Public Health*. 2021 Mar 15;193:48-56.
5. Rashid T, Bennett JE, Paciorek CJ, et al. Life expectancy and risk of death in 6791 communities in England from 2002 to 2019: high-resolution spatiotemporal analysis of civil registration data. *Lancet Public Health* 2021; 6(11): e805-e816.
6. Ramsay J., Minton J., Fischbacher C., Fenton L. et al. How have changes in death by cause and age group contributed to the recent stalling of life expectancy gains in Scotland? Comparative decomposition analysis of mortality data, 2000-2002 to 2015-2017. *BMJ Open* 2020; 10 (10):e036529
7. Public Health England (PHE). A review of recent trends in mortality in England. London: PHE; 2018
8. McCartney G., Walsh D., Fenton L., Devine R. Resetting the course for population health: evidence and recommendations to address stalled mortality improvements in Scotland and the rest of the UK. Glasgow: Glasgow Centre for Population Health/University of Glasgow; 2022. Available from: [https://www.gcph.co.uk/assets/0000/8723/Stalled\\_Mortality\\_report\\_FINAL\\_WEB.pdf](https://www.gcph.co.uk/assets/0000/8723/Stalled_Mortality_report_FINAL_WEB.pdf) (Accessed June 2022)
9. Richardson E, Fenton L, Parkinson J, Pulford A, Taulbut M, McCartney G, Robinson M. The effect of income-based policies on mortality inequalities in Scotland: a modelling study. *Lancet Public Health* 2020: e150-e156..
10. Alexiou A, Fahy K, Mason K. et al. Local government funding and life expectancy in England: a longitudinal ecological study. *Lancet Public Health* 2021; 6(9): e641-e647.
11. Martin S., Longo F., Lomas J., Claxton K. Causal impact of social care, public health and healthcare expenditure on mortality in England: cross-sectional evidence for 2013/2014. *BMJ Open* 2021; 11(10): e046417
12. Koltai J., McKee M., Stuckler D. Association between disability-related budget reductions and increasing drug-related mortality across local authorities in Great Britain. *Social Science & Medicine* 2021; 284: 114225
13. Dorling, D. Austerity and Mortality. In: Cooper V., Whyte D. *The Violence of Austerity*, London: Pluto Press; 2017.

14. Stuckler D., Reeves A., Loopstra R., Karanikolos M., McKee M. Austerity and health: the impact in the UK and Europe. *Eur J Public Health*. 2017; 27(suppl\_4):18-21.
15. Rajmil L., Fernández de Sanmamed M-J. Austerity Policies and Mortality Rates in European Countries, 2011-2015. *American Journal of Public Health* 2019; 109: 768-770
16. Toffolutti V., Suhrcke M. Does austerity really kill? *Economics & Human Biology* 2019; 33: 211-22
17. Broadbent P., McCartney G., Walsh D., Katikireddi S.V., Gallagher C. Is austerity responsible for the stalled mortality trends across many high-income countries? A systematic review. Submitted for publication.
18. McCartney G., McMaster R., Popham F., Dundas R., Walsh D. Is austerity a cause of slower improvements in mortality in high income countries? A panel analysis. *Social Science & Medicine* 2022; 313: 115397
19. Raleigh VS. Stalling life expectancy in the UK. *BMJ* 2018; 362 :k4050.
20. Preston SH, Vierboom YC, Stokes A. The role of obesity in exceptionally slow US mortality improvement. *Proc Natl Acad Sci* 2018; 115(5): 957-961.
21. Adair T, Lopez AD. The role of overweight and obesity in adverse cardiovascular disease mortality trends: an analysis of multiple cause of death data from Australia and the USA. *BMC Medicine* 2020; 18(1): 199.
22. Lopez AD, Adair T. Is the long-term decline in cardiovascular-disease mortality in high-income countries over? Evidence from national vital statistics. *Int J Epidemiol* 2019; 48(6): 1815-1823.
23. Global BMI Mortality Collaboration. Body-mass index and all-cause mortality: individual-participant-data meta-analysis of 239 prospective studies in four continents. *Lancet* 2016; 388(10046): 776-86
24. Foresight. Tackling Obesities: Future Choices - Project Report (2nd edition). London, UK Government Office for Science, 2007.
25. Joint Health Surveys Unit of Social and Community Planning Research and University College London. *Scottish Health Survey 1995 (4th Edition)*. Colchester, Essex: UK Data Archive; 2018. SN: 3807, <http://doi.org/10.5255/UKDA-SN-3807-2>
26. University College London, Department of Epidemiology and Public Health, Scottish Centre for Social Research. *Scottish Health Survey 2008 (4th Edition)*. UK Data Service; 2021. SN: 6383, <http://doi.org/10.5255/UKDA-SN-6383-4>
27. Higgins V., Marshall, A. Health Survey for England Time Series Dataset, 1991-2009. Colchester, Essex: UK Data Archive; 2012. SN: 7025.
28. Bromley C., Bradshaw P., Given L. *The Scottish Health Survey 2008 - Volume 2 Technical Report*. Edinburgh: The Scottish Government; 2019
29. Joint Health Surveys Unit. *Health Survey for England 2008 User Guide*. London: University College London; 2008
30. Mansournia A. M., Altman D.G. Population attributable fraction. *BMJ* 2018; 360:k757

- 1  
2  
3 31. European Commission. Revision of the European Standard Population - Report of  
4 Eurostat's task force. Luxembourg: Publications Office of the European Union; 2013.  
5 Available from: [https://ec.europa.eu/eurostat/documents/3859598/5926869/KS-RA-13-](https://ec.europa.eu/eurostat/documents/3859598/5926869/KS-RA-13-028-EN.PDF/e713fa79-1add-44e8-b23d-5e8fa09b3f8f)  
6 [028-EN.PDF/e713fa79-1add-44e8-b23d-5e8fa09b3f8f](https://ec.europa.eu/eurostat/documents/3859598/5926869/KS-RA-13-028-EN.PDF/e713fa79-1add-44e8-b23d-5e8fa09b3f8f) (Accessed June 2022)  
7
- 8  
9 32. Bhaskaran K., Dos-Santos-Silva I., Leon D.A., Douglas I.J., Smeeth L. Association of BMI  
10 with overall and cause-specific mortality: a population-based cohort study of 3.6 million  
11 adults in the UK. *Lancet Diabetes Endocrinol.* 2018; 6(12): 944-953  
12
- 13 33. Barendregt JJ, Veerman JL. Categorical versus continuous risk factors and the calculation  
14 of potential impact fractions. *J Epidemiol Community Health.* 2010 Mar;64(3):209-12.  
15
- 16 34. Gray L., Gorman E., White I.R. et al. Correcting for non-participation bias in health  
17 surveys using record-linkage, synthetic observations and pattern mixture modelling.  
18 *Statistical Methods in Medical Research* 2020; 29(4): 1212-1226.  
19
- 20 35. Moody A. Health Survey for England 2019: Adult and child overweight and obesity.  
21 Available from: [https://digital.nhs.uk/data-and-information/publications/statistical/health-](https://digital.nhs.uk/data-and-information/publications/statistical/health-survey-for-england/2019)  
22 [survey-for-england/2019](https://digital.nhs.uk/data-and-information/publications/statistical/health-survey-for-england/2019) (Accessed June 2022)  
23
- 24 36. Flegal K.M., Panagiotou O.A., Graubard B.I. Estimating population attributable fractions  
25 to quantify the health burden of obesity. *Annals of Epidemiology* 2015; 25(3): 201-7  
26
- 27 37. Danaei G., Ding E.L., Mozaffarian D., Taylor B., Rehm J., Murray C.J., Ezzati M. The  
28 preventable causes of death in the United States: comparative risk assessment of dietary,  
29 lifestyle, and metabolic risk factors. *PLoS Medicine* 2009; 6(4): e1000058  
30
- 31 38. Foresight. Tackling Obesities: Future Choices - Project Report (2nd edition). London, UK  
32 Government Office for Science, 2007.  
33
- 34 39. Levine B.J. The other causality question: estimating attributable fractions for obesity as a  
35 cause of mortality. *International Journal of Obesity* 2008; 32:S4-7  
36
- 37 40. McHugh M.D. Fit or fat? A review of the debate on deaths attributable to obesity. *Public*  
38 *Health Nursing* 2006; 23(3): 264-70  
39
- 40 41. Hernán M.A., Taubman S.L. Does obesity shorten life? The importance of well-defined  
41 interventions to answer causal questions. *International Journal of Obesity* 2008;32: S8-14  
42
- 43 42. Poole C. A history of the population attributable fraction and related measures. *Annals*  
44 *of Epidemiology* 2015; 25(3): 147-54  
45
- 46 43. Vidra N., Bijlsma M.J., Janssen F. Impact of Different Estimation Methods on Obesity-  
47 Attributable Mortality Levels and Trends: The Case of The Netherlands. *Int J Environ Res*  
48 *Public Health* 2018; 15(10):2146  
49
- 50 44. Ho F.K., Celis-Morales C., Petermann-Rocha F., Parra-Soto S.L., Lewsey J., Mackay D., Pell  
51 J.P. Changes over 15 years in the contribution of adiposity and smoking to deaths in England  
52 and Scotland. *BMC Public Health* 2021; 21(1): 169  
53
- 54 45. Kessler M., Thumé E., Scholes S., Marmot M. et al. Modifiable risk factors for 9-year  
55 mortality in older English and Brazilian adults: the ELSA and SIGa-Bagé ageing cohorts. *Sci*  
56 *Rep* 2020; 10(1): 4375  
57  
58  
59  
60

1  
2  
3  
4  
5  
6  
7  
8  
9  
10  
11  
12  
13  
14  
15  
16  
17  
18  
19  
20  
21  
22  
23  
24  
25  
26  
27  
28  
29  
30  
31  
32  
33  
34  
35  
36  
37  
38  
39  
40  
41  
42  
43  
44  
45  
46  
47  
48  
49  
50  
51  
52  
53  
54  
55  
56  
57  
58  
59  
60

46. Stringhini S., Carmeli C., Jokela M., Avendaño M. et al. Socioeconomic status and the 25×25 risk factors as determinants of premature mortality: a multicohort study and meta-analysis of 1·7 million men and women. *Lancet* 2017; 389(10075): 1229-1237

For peer review only

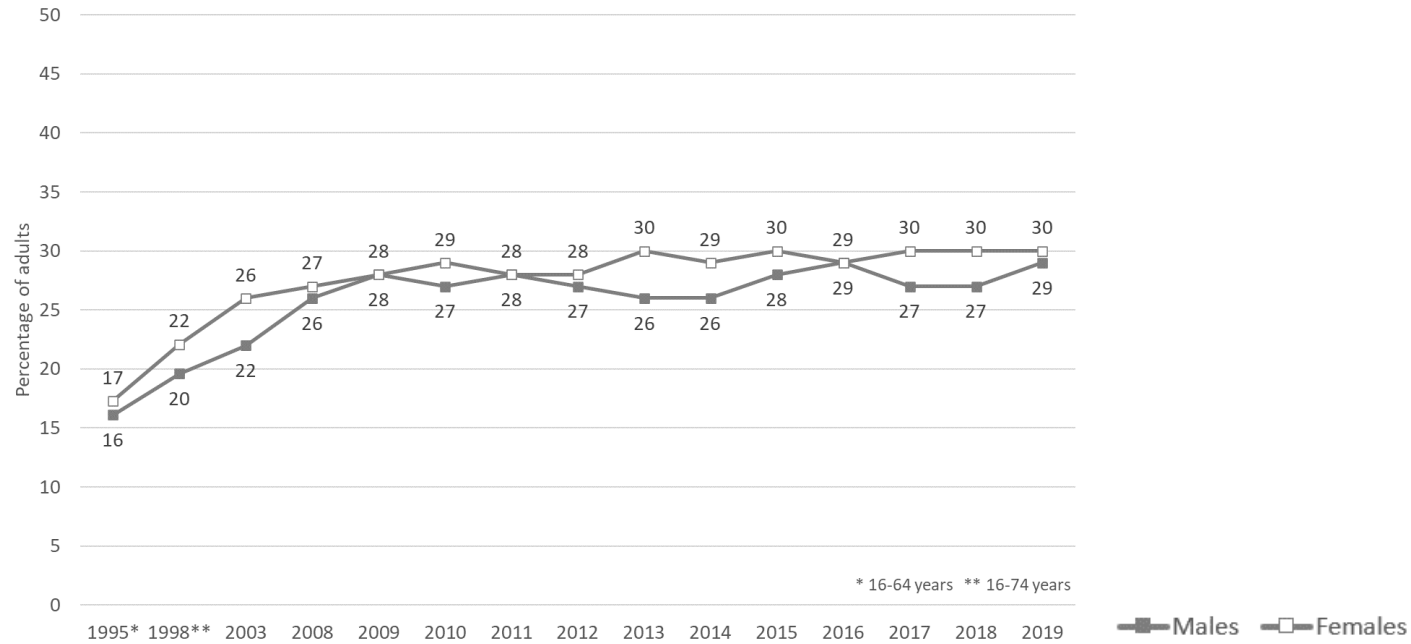

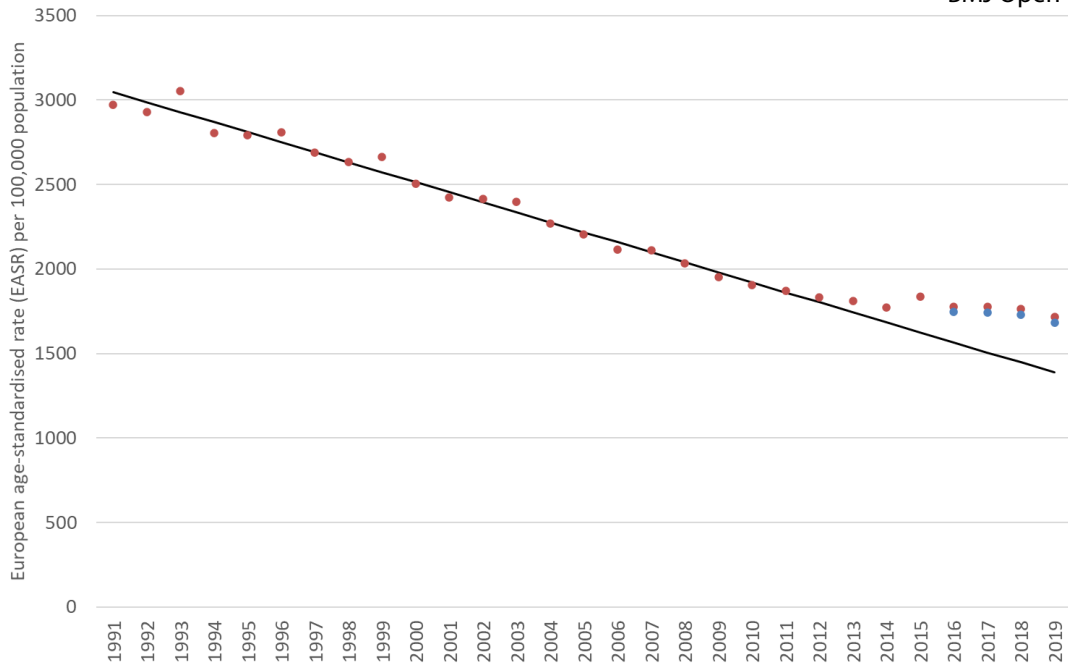

- Observed rate
- Predicted rate
- BMI-adjusted rate

b) Females

Females, 35-89 years, Scotland

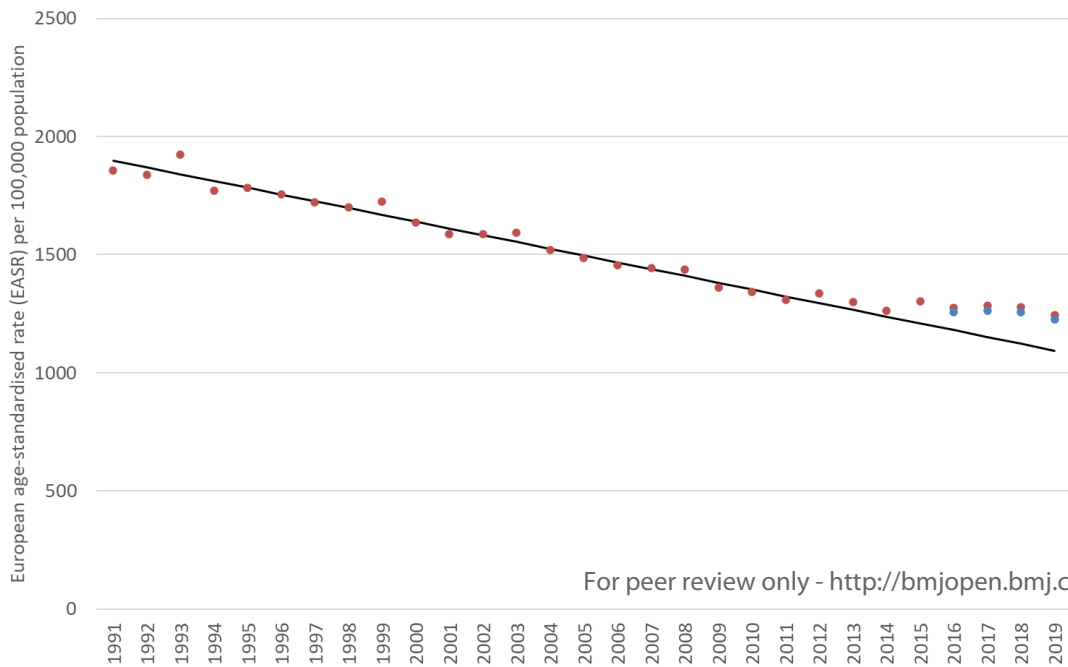

1  
2  
3  
4  
5  
6  
7  
8  
9  
10  
11  
12  
13  
14  
15  
16  
17  
18  
19  
20  
21  
22  
23  
24  
25  
26  
27  
28  
29  
30  
31  
32  
33  
34  
35  
36  
37  
38  
39  
40  
41

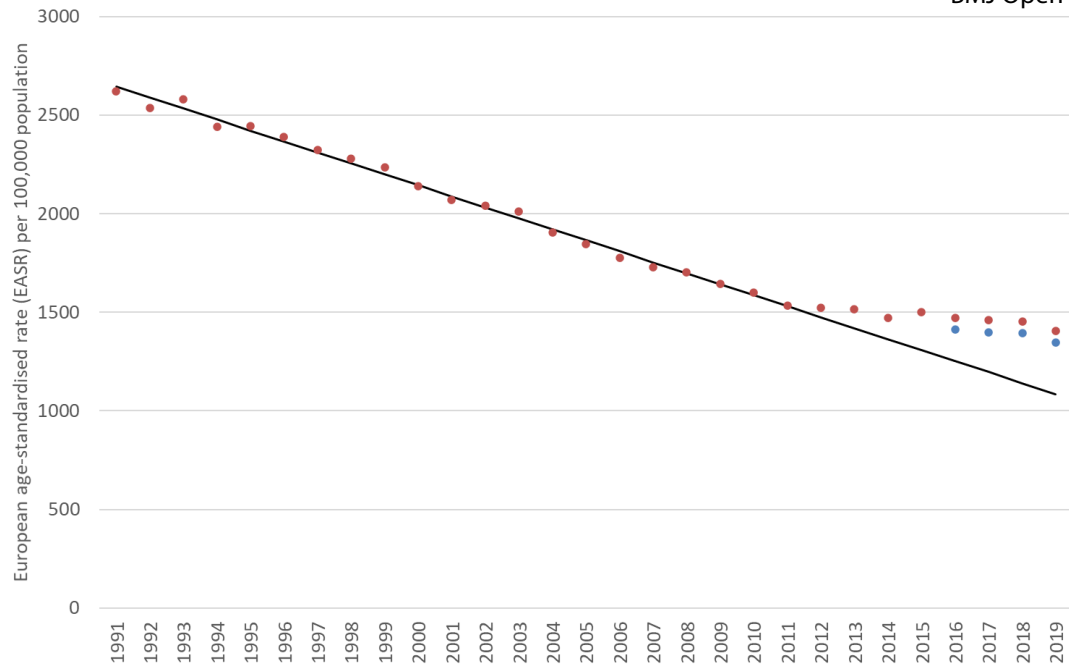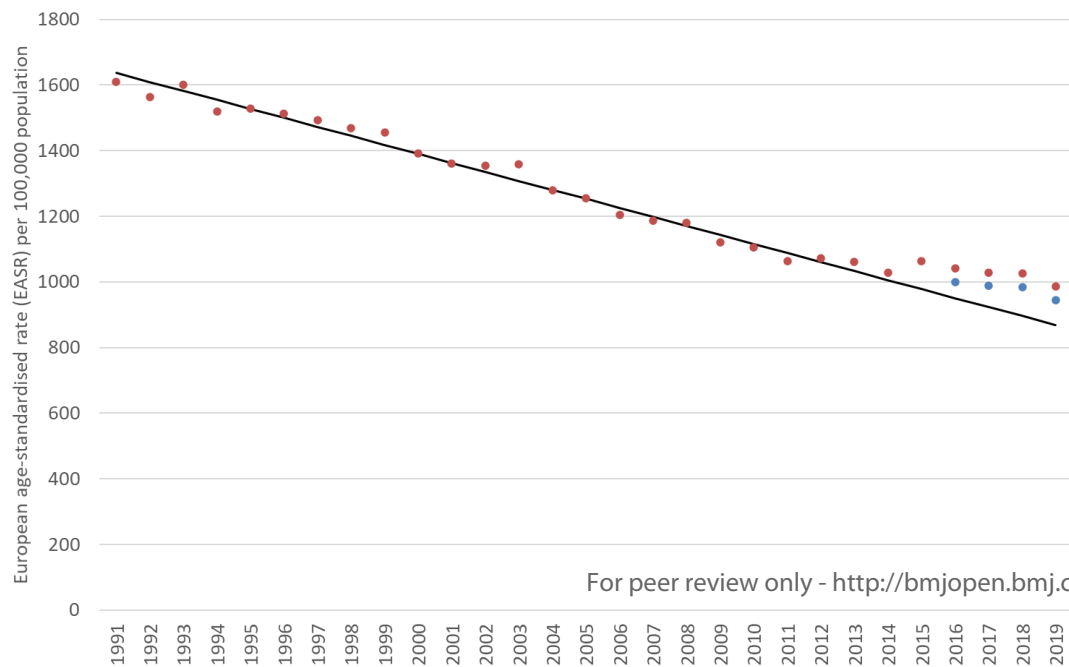

1  
2  
3  
4  
5  
6  
7  
8  
9  
10  
11  
12  
13  
14  
15  
16  
17  
18  
19  
20  
21  
22  
23  
24  
25  
26  
27  
28  
29  
30  
31  
32  
33  
34  
35  
36  
37  
38  
39  
40  
41

1  
2  
3  
4  
5  
6  
7  
8  
9  
10  
11  
12  
13  
14  
15  
16  
17  
18  
19  
20  
21  
22  
23  
24  
25  
26  
27  
28  
29  
30  
31  
32  
33  
34  
35  
36  
37  
38  
39  
40  
41  
42  
43  
44  
45  
46  
47  
48  
49  
50  
51  
52  
53  
54  
55  
56  
57  
58  
59  
60

**Online appendix**

For peer review only



## Supplementary tables

### Supplementary Table S1.

Hazard ratios for BMI categories by age group from The Global BMI Mortality Collaboration (GBMC) 2016 study<sup>1</sup>. Taken from eTable 11 (European studies only).

| Age group (years) | Underweight (BMI 15 to <18.5 kg/m <sup>2</sup> ) | Normal weight (BMI 18.5 to <25 kg/m <sup>2</sup> ) | Overweight (BMI 25 to <30 kg/m <sup>2</sup> ) | Obesity Grade I (BMI 30 to <35 kg/m <sup>2</sup> ) | Obesity Grade II (BMI 35 to <40 kg/m <sup>2</sup> ) | Obesity Grade III (BMI 40 to <60 kg/m <sup>2</sup> ) |
|-------------------|--------------------------------------------------|----------------------------------------------------|-----------------------------------------------|----------------------------------------------------|-----------------------------------------------------|------------------------------------------------------|
| 35-49             | 1.86                                             | 1.00                                               | 1.17                                          | 1.90                                               | 3.01                                                | 5.34                                                 |
| 50-69             | 2.25                                             | 1.00                                               | 1.11                                          | 1.60                                               | 2.23                                                | 4.04                                                 |
| 70-89             | 1.65                                             | 1.00                                               | 0.98                                          | 1.12                                               | 1.56                                                | 1.91                                                 |

### Supplementary Table S2.

Sample sizes for 35-89 year-olds in 1995 and 2008, Scottish Health Survey (SHeS) and Health Survey for England (HSE).

| Age group | SHeS 1995      | SHeS 2008 | HSE 1995 | HSE 2008 |
|-----------|----------------|-----------|----------|----------|
| 35-49     | 2,381          | 1,532     | 3,918    | 3,547    |
| 50-69*    | 1,801          | 1,628     | 3,973    | 3,692    |
| 70-89     | 0 <sup>†</sup> | 669       | 1,831    | 1,507    |
| Total     | 4,182          | 3,829     | 9,722    | 8,746    |

*Methodological note: BMI category proportions for 65-69 and 70-89 years for 1995 SHeS (which only sampled 16-64 years) were derived from analysis of 2003 SHeS data (the first survey that included a sample of all adults aged 16+). Thus, for each BMI category the difference in proportions between 15-64 years and 15-69 years in 2003 were applied to 1995 data for 15-64 years to give a likely estimate for 15-69 years. Similarly, the differences in each category between 50-69 years and 70-89 years in the 2003 survey were then applied to 1995 data to provide an estimate for 70-89 years.*

\* 50-64 years in 1995 SHeS: in 2003 SHeS there were 1,975 in this age group, including 1,573 in the 50-64 group (as described above, these data were used to derive estimates for 1995)

<sup>†</sup> Sample size in 2003 SHeS (used to derive estimates for 1995) was 779.

**Supplementary Table S3.**

Hazard ratios for BMI categories by age group approximated from Bhaskaran et al<sup>2</sup> (sensitivity analyses).

| Age group (years) | Underweight (BMI 15 to <18.5 kg/m <sup>2</sup> ) | Normal weight (BMI 18.5 to <25 kg/m <sup>2</sup> ) | Overweight (BMI 25 to <30 kg/m <sup>2</sup> ) | Obesity Grade I (BMI 30 to <35 kg/m <sup>2</sup> ) | Obesity Grade II (BMI 35 to <40 kg/m <sup>2</sup> ) | Obesity Grade III (BMI 40 to <60 kg/m <sup>2</sup> ) |
|-------------------|--------------------------------------------------|----------------------------------------------------|-----------------------------------------------|----------------------------------------------------|-----------------------------------------------------|------------------------------------------------------|
| 16-49             | 1.73                                             | 1.00                                               | 1.27                                          | 1.65                                               | 2.31                                                | 2.84                                                 |
| 50-69             | 1.79                                             | 1.00                                               | 1.12                                          | 1.43                                               | 1.89                                                | 2.54                                                 |
| 70-79             | 1.88                                             | 1.00                                               | 1.03                                          | 1.27                                               | 1.63                                                | 2.34                                                 |
| 80+               | 1.25                                             | 1.00                                               | 0.96                                          | 1.07                                               | 1.24                                                | 1.56                                                 |

*Methodological note: HRs by age group for the same BMI categories used in the GBMC paper were not available. Instead, values were approximated from the Bhaskaran et al paper's Figure 3b ('Association between BMI and all-cause mortality among never-smokers by age') using Digitizeit software ([www.digitizeit.de](http://www.digitizeit.de)): the latter enabled extraction of approximate data values from the Figure. For each BMI category, the mid-point of the associated HR range was used; this was done separately for each age group<sup>‡</sup>. As the Figure presented logHR values, the extracted data were also exponentiated.*

**Supplementary Table S4.**

Population attributable fractions (PAFs) by age group (main analyses).

| Age group (years) | Scotland (SHes) | England (HSE) |
|-------------------|-----------------|---------------|
| 35-49             | 0.116           | 0.115         |
| 50-69             | 0.071           | 0.071         |
| 70-89             | -0.008          | 0.028         |

<sup>‡</sup> Note that for the highest BMI category (Grade III obesity), the mid-point between BMI 40 and the maximum BMI value was used (as BMI values did not exceed 50 in the sample).

**Supplementary Table S5.**

Comparison of main analyses using 1981-, 1991- and 2001-based mortality projections (2017-19 mortality data)

|                   | <b>Observed rate</b> | <b>BMI-adjusted rate</b> | <b>Projected rate (1981)</b> | <b>% of observed-projected difference attributable to BMI change</b> | <b>Projected rate (1991)</b> | <b>% of observed-projected difference attributable to BMI change</b> | <b>Projected rate (2001)</b> | <b>% of observed-projected difference attributable to BMI change</b> |
|-------------------|----------------------|--------------------------|------------------------------|----------------------------------------------------------------------|------------------------------|----------------------------------------------------------------------|------------------------------|----------------------------------------------------------------------|
| Scotland, males   | 1750.7               | 1718.8                   | 1503.7                       | 12.9%                                                                | 1447.1                       | 10.5%                                                                | 1423.7                       | 9.8%                                                                 |
| Scotland, females | 1268.0               | 1248.3                   | 1147.4                       | 16.3%                                                                | 1122.8                       | 13.6%                                                                | 1106.7                       | 12.2%                                                                |
| England, males    | 1438.5               | 1378.6                   | 1183.9                       | 23.5%                                                                | 1140.6                       | 20.1%                                                                | 1143.8                       | 20.3%                                                                |
| England, females  | 1013.5               | 972.6                    | 927.4                        | 47.5%                                                                | 896.2                        | 34.9%                                                                | 847.6                        | 24.7%                                                                |

**Supplementary Table S6.**

Population attributable fractions (PAFs) by age group using HRs approximated from Bhaskaran et al (sensitivity analyses).

| Age group (years) | Scotland (SHeS) | England (HSE) |
|-------------------|-----------------|---------------|
| 16-49             | 0.069           | 0.055         |
| 50-69             | 0.050           | 0.046         |
| 70-79             | 0.026           | 0.043         |
| 80+               | -0.077          | 0.004         |

**Supplementary Table S7.**

Comparison of main results with sensitivity analyses using PAFs calculated from HRs approximated from Bhaskaran et al and applied to different age-specific mortality analyses, England 2017-19 (and using 1991-based mortality projections).

*Methodological note: the PAFs shown in Table S6 above were applied to different age groups in the mortality analysis. For direct comparison with the main results, they were applied to the same 35-89 age band. However, as HRs were available for ages 16-80+ years, they were additionally applied to mortality data with corresponding ages (15 years+, as mortality data were accessed in five year age bands). Further sensitivity analyses restricted the age group to 15-84 years. Results are shown below for England only.*

|         | % observed-projected difference attributable to BMI change |                                  |                                  |                                |
|---------|------------------------------------------------------------|----------------------------------|----------------------------------|--------------------------------|
|         | Main analyses (35-89 years using GBMC HRs)                 | Bhaskaran et al HRs, 35-89 years | Bhaskaran et al HRs, 15-84 years | Bhaskaran et al HRs, 15+ years |
| Males   | 20.1%                                                      | 16.4%                            | 15.1%                            | 13.2%                          |
| Females | 34.9%                                                      | 28.9%                            | 25.9%                            | 22.9%                          |

**Supplementary Table S8.**

Population attributable fractions (PAFs) by age group using three-year averages instead of single years (sensitivity analyses).

*Methodological note: for English data, comparisons were made between the single year approach (i.e. the change in BMI distribution between 1995 and 2008) and three year averages around those single years (i.e. 1994-96 and 2007-09). This was not possible for Scottish data: there were no surveys run in 1994, 1996 or 2007; thus, comparisons were instead made between 1995 and 2008, and 1995 and 2008-10.*

| Age group (years) | Scotland (SHeS) 1995 and 2008-10 | England (HSE), using 1994-96 and 2007-09 |
|-------------------|----------------------------------|------------------------------------------|
| 35-49             | 0.124                            | 0.108                                    |
| 50-69             | 0.076                            | 0.072                                    |
| 70-89             | -0.006                           | 0.023                                    |

**Supplementary Table S9.**

Comparison of main results with sensitivity analyses using PAFs derived from 2008-10 instead of 2008 in the Scottish Health Survey, and applied to analyses of 2017-19 Scottish mortality data (using 1991-based mortality projections).

See methodological note for Supplementary Table S8.

|         | Observed rate | Projected rate (1991) | Main analyses (1995 and 2008) |                                                               | Sensitivity analyses (1995 and 2008-10) |                                                               |
|---------|---------------|-----------------------|-------------------------------|---------------------------------------------------------------|-----------------------------------------|---------------------------------------------------------------|
|         |               |                       | BMI-adjusted rate             | % of observed-projected difference attributable to BMI change | BMI-adjusted rate                       | % of observed-projected difference attributable to BMI change |
| Males   | 1750.7        | 1447.1                | 1718.8                        | 10.5%                                                         | 1713.1                                  | 12.4%                                                         |
| Females | 1268.0        | 1122.8                | 1248.3                        | 13.6%                                                         | 1244.4                                  | 16.3%                                                         |

**Supplementary Table 10.**

See methodological note for Supplementary Table S8.

Comparison of main results with sensitivity analyses using PAFs derived from 1994-96 and 2007-09 instead of 1995 and 2008 respectively in the Health Survey for England, and applied to analyses of 2017-19 English mortality data (using 1991-based mortality projections)

|         | Observed rate | Projected rate (1991) | Main analyses (1995 and 2008) |                                                               | Sensitivity analyses (1994-96 and 2007-09) |                                                               |
|---------|---------------|-----------------------|-------------------------------|---------------------------------------------------------------|--------------------------------------------|---------------------------------------------------------------|
|         |               |                       | BMI-adjusted rate             | % of observed-projected difference attributable to BMI change | BMI-adjusted rate                          | % of observed-projected difference attributable to BMI change |
| Males   | 1438.5        | 1140.6                | 1378.6                        | 20.1%                                                         | 1383.8                                     | 18.4%                                                         |
| Females | 1013.5        | 896.2                 | 972.6                         | 34.9%                                                         | 976.3                                      | 31.7%                                                         |

Supplementary Figures

Supplementary Figure S1.

Observed, predicted and BMI-adjusted European age-standardised mortality rates (EASRs), Scotland 1981-2019 – comparing 1981-, 1991- and 2001-based predictions. Note different y-axis scales for males and females.

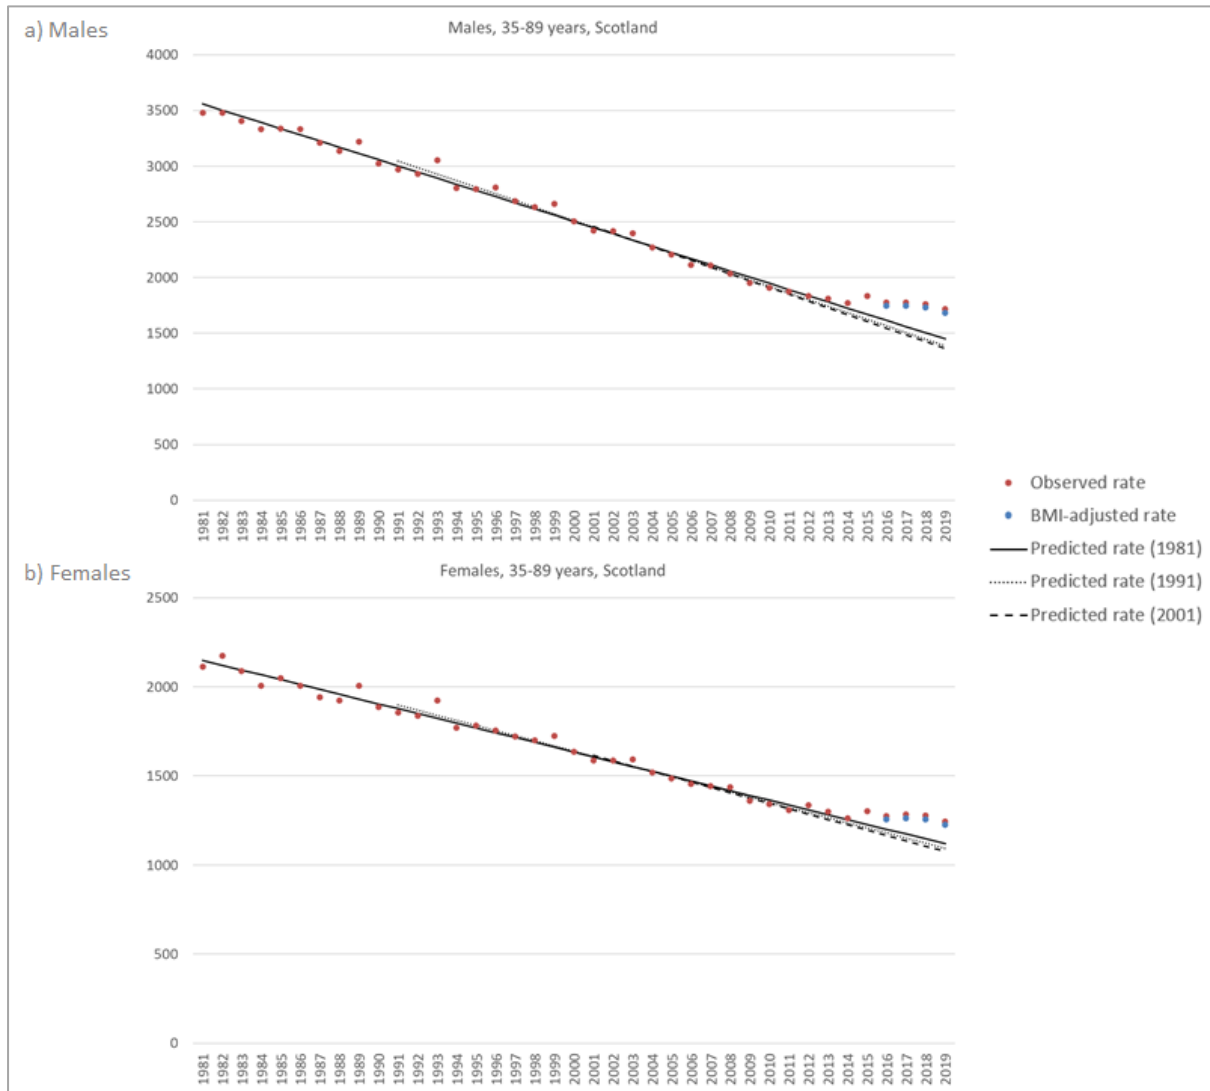

Supplementary Figure S2.

Observed, predicted and BMI-adjusted European age-standardised mortality rates (EASRs), Scotland 1981-2019 – comparing 1981-, 1991- and 2001-based predictions. Note different y-axis scales for males and females.



**Supplementary Figure S3.**

Trends in the percentage of adults aged 70-89 years classed as Obese Grade I (BMI 30 to <35), Scotland, 1995-2019





Supplementary Figure S4.

Trends in the percentage of adults aged 70-89 years in different BMI categories, Scotland and England, 1995-2019

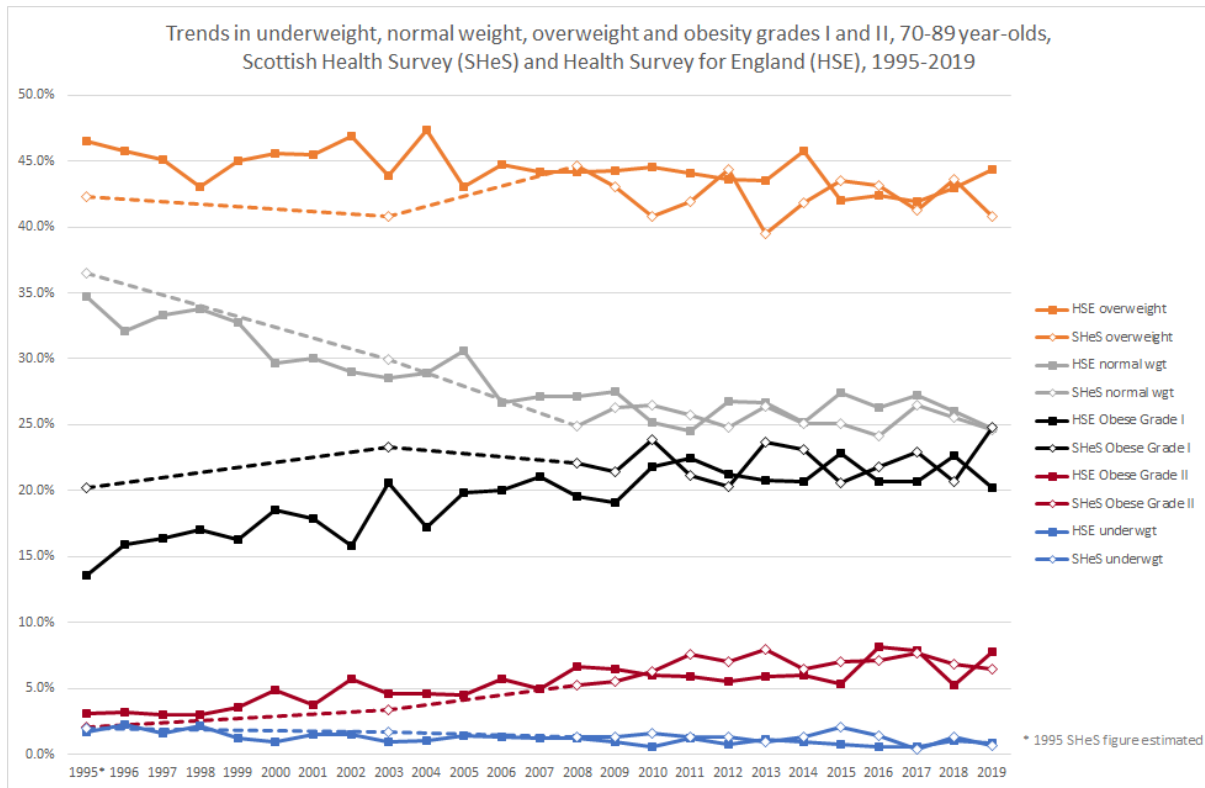

1  
2  
3 References  
4  
5

6 <sup>1</sup> Global BMI Mortality Collaboration. Body-mass index and all-cause mortality: individual-  
7 participant-data meta-analysis of 239 prospective studies in four continents. Lancet 2016;  
8 388(10046): 776-86  
9

10 <sup>2</sup> Bhaskaran K., Dos-Santos-Silva I., Leon D.A., Douglas I.J., Smeeth L. Association of BMI with overall  
11 and cause-specific mortality: a population-based cohort study of 3.6 million adults in the UK. Lancet  
12 Diabetes Endocrinol. 2018; 6(12): 944-953  
13  
14  
15  
16  
17  
18  
19  
20  
21  
22  
23  
24  
25  
26  
27  
28  
29  
30  
31  
32  
33  
34  
35  
36  
37  
38  
39  
40  
41  
42  
43  
44  
45  
46  
47  
48  
49  
50  
51  
52  
53  
54  
55  
56  
57  
58  
59  
60

For peer review only

## STROBE Statement—checklist of items that should be included in reports of observational studies

|                              | Item No | Recommendation                                                                                                                                                                                                                                                                                                                                                                                                                                                         | Page No |
|------------------------------|---------|------------------------------------------------------------------------------------------------------------------------------------------------------------------------------------------------------------------------------------------------------------------------------------------------------------------------------------------------------------------------------------------------------------------------------------------------------------------------|---------|
| <b>Title and abstract</b>    | 1       | (a) Indicate the study's design with a commonly used term in the title or the abstract                                                                                                                                                                                                                                                                                                                                                                                 | 1       |
|                              |         | (b) Provide in the abstract an informative and balanced summary of what was done and what was found                                                                                                                                                                                                                                                                                                                                                                    | 2-3     |
| <b>Introduction</b>          |         |                                                                                                                                                                                                                                                                                                                                                                                                                                                                        |         |
| Background/rationale         | 2       | Explain the scientific background and rationale for the investigation being reported                                                                                                                                                                                                                                                                                                                                                                                   | 4       |
| Objectives                   | 3       | State specific objectives, including any prespecified hypotheses                                                                                                                                                                                                                                                                                                                                                                                                       | 4       |
| <b>Methods</b>               |         |                                                                                                                                                                                                                                                                                                                                                                                                                                                                        |         |
| Study design                 | 4       | Present key elements of study design early in the paper                                                                                                                                                                                                                                                                                                                                                                                                                | 5-7     |
| Setting                      | 5       | Describe the setting, locations, and relevant dates, including periods of recruitment, exposure, follow-up, and data collection                                                                                                                                                                                                                                                                                                                                        | 5-6     |
| Participants                 | 6       | (a) <i>Cohort study</i> —Give the eligibility criteria, and the sources and methods of selection of participants. Describe methods of follow-up<br><i>Case-control study</i> —Give the eligibility criteria, and the sources and methods of case ascertainment and control selection. Give the rationale for the choice of cases and controls<br><i>Cross-sectional study</i> —Give the eligibility criteria, and the sources and methods of selection of participants | 5-7     |
|                              |         | (b) <i>Cohort study</i> —For matched studies, give matching criteria and number of exposed and unexposed<br><i>Case-control study</i> —For matched studies, give matching criteria and the number of controls per case                                                                                                                                                                                                                                                 |         |
| Variables                    | 7       | Clearly define all outcomes, exposures, predictors, potential confounders, and effect modifiers. Give diagnostic criteria, if applicable                                                                                                                                                                                                                                                                                                                               | 5-7     |
| Data sources/<br>measurement | 8*      | For each variable of interest, give sources of data and details of methods of assessment (measurement). Describe comparability of assessment methods if there is more than one group                                                                                                                                                                                                                                                                                   | 5-7     |
| Bias                         | 9       | Describe any efforts to address potential sources of bias                                                                                                                                                                                                                                                                                                                                                                                                              | 7       |
| Study size                   | 10      | Explain how the study size was arrived at                                                                                                                                                                                                                                                                                                                                                                                                                              | 5       |
| Quantitative<br>variables    | 11      | Explain how quantitative variables were handled in the analyses. If applicable, describe which groupings were chosen and why                                                                                                                                                                                                                                                                                                                                           | 5-6     |
| Statistical methods          | 12      | (a) Describe all statistical methods, including those used to control for confounding                                                                                                                                                                                                                                                                                                                                                                                  | 5-7     |
|                              |         | (b) Describe any methods used to examine subgroups and interactions                                                                                                                                                                                                                                                                                                                                                                                                    | 5-7     |
|                              |         | (c) Explain how missing data were addressed                                                                                                                                                                                                                                                                                                                                                                                                                            | n/a     |
|                              |         | (d) <i>Cohort study</i> —If applicable, explain how loss to follow-up was addressed<br><i>Case-control study</i> —If applicable, explain how matching of cases and controls was addressed<br><i>Cross-sectional study</i> —If applicable, describe analytical methods taking account of sampling strategy                                                                                                                                                              | n/a     |
|                              |         | (e) Describe any sensitivity analyses                                                                                                                                                                                                                                                                                                                                                                                                                                  | 7       |

Continued on next page

1  
2  
3  
4  
5  
6  
7  
8  
9  
10  
11  
12  
13  
14  
15  
16  
17  
18  
19  
20  
21  
22  
23  
24  
25  
26  
27  
28  
29  
30  
31  
32  
33  
34  
35  
36  
37  
38  
39  
40  
41  
42  
43  
44  
45  
46  
47  
48  
49  
50  
51  
52  
53  
54  
55  
56  
57  
58  
59  
60**Results**

|                  |     |                                                                                                                                                                                                              |                                |
|------------------|-----|--------------------------------------------------------------------------------------------------------------------------------------------------------------------------------------------------------------|--------------------------------|
| Participants     | 13* | (a) Report numbers of individuals at each stage of study—eg numbers potentially eligible, examined for eligibility, confirmed eligible, included in the study, completing follow-up, and analysed            | 6 (and Supplementary Table S2) |
|                  |     | (b) Give reasons for non-participation at each stage                                                                                                                                                         |                                |
|                  |     | (c) Consider use of a flow diagram                                                                                                                                                                           |                                |
| Descriptive data | 14* | (a) Give characteristics of study participants (eg demographic, clinical, social) and information on exposures and potential confounders                                                                     | 7                              |
|                  |     | (b) Indicate number of participants with missing data for each variable of interest                                                                                                                          | n/a (total population)         |
|                  |     | (c) <i>Cohort study</i> —Summarise follow-up time (eg, average and total amount)                                                                                                                             |                                |
| Outcome data     | 15* | <i>Cohort study</i> —Report numbers of outcome events or summary measures over time                                                                                                                          |                                |
|                  |     | <i>Case-control study</i> —Report numbers in each exposure category, or summary measures of exposure                                                                                                         |                                |
|                  |     | <i>Cross-sectional study</i> —Report numbers of outcome events or summary measures                                                                                                                           | 7-9                            |
| Main results     | 16  | (a) Give unadjusted estimates and, if applicable, confounder-adjusted estimates and their precision (eg, 95% confidence interval). Make clear which confounders were adjusted for and why they were included | 7-10                           |
|                  |     | (b) Report category boundaries when continuous variables were categorized                                                                                                                                    | n/a                            |
|                  |     | (c) If relevant, consider translating estimates of relative risk into absolute risk for a meaningful time period                                                                                             | n/a                            |
| Other analyses   | 17  | Report other analyses done—eg analyses of subgroups and interactions, and sensitivity analyses                                                                                                               | 9                              |

**Discussion**

|                  |    |                                                                                                                                                                            |       |
|------------------|----|----------------------------------------------------------------------------------------------------------------------------------------------------------------------------|-------|
| Key results      | 18 | Summarise key results with reference to study objectives                                                                                                                   | 10    |
| Limitations      | 19 | Discuss limitations of the study, taking into account sources of potential bias or imprecision. Discuss both direction and magnitude of any potential bias                 | 11    |
| Interpretation   | 20 | Give a cautious overall interpretation of results considering objectives, limitations, multiplicity of analyses, results from similar studies, and other relevant evidence | 10    |
| Generalisability | 21 | Discuss the generalisability (external validity) of the study results                                                                                                      | 12-13 |

**Other information**

|         |    |                                                                                                                                                               |    |
|---------|----|---------------------------------------------------------------------------------------------------------------------------------------------------------------|----|
| Funding | 22 | Give the source of funding and the role of the funders for the present study and, if applicable, for the original study on which the present article is based | 15 |
|---------|----|---------------------------------------------------------------------------------------------------------------------------------------------------------------|----|

\*Give information separately for cases and controls in case-control studies and, if applicable, for exposed and unexposed groups in cohort and cross-sectional studies.

**Note:** An Explanation and Elaboration article discusses each checklist item and gives methodological background and published examples of transparent reporting. The STROBE checklist is best used in conjunction with this article (freely available on the Web sites of PLoS Medicine at <http://www.plosmedicine.org/>, Annals of Internal Medicine at

1  
2 <http://www.annals.org/>, and *Epidemiology* at <http://www.epidem.com/>). Information on the STROBE Initiative is  
3 available at [www.strobe-statement.org](http://www.strobe-statement.org).  
4  
5  
6  
7  
8  
9  
10  
11  
12  
13  
14  
15  
16  
17  
18  
19  
20  
21  
22  
23  
24  
25  
26  
27  
28  
29  
30  
31  
32  
33  
34  
35  
36  
37  
38  
39  
40  
41  
42  
43  
44  
45  
46  
47  
48  
49  
50  
51  
52  
53  
54  
55  
56  
57  
58  
59  
60

For peer review only
